1           **Translation control by maternal Nanog promotes oocyte**  
2                   **maturation and early embryonic development**

3   **Mudan He<sup>1,2&</sup>, Shengbo Jiao<sup>1,2&</sup>, Ding Ye<sup>1,2</sup>, Houpeng Wang<sup>1,2</sup>, Yonghua**  
4   **Sun<sup>1,2,3\*</sup>**

5   <sup>1</sup>State Key Laboratory of Freshwater Ecology and Biotechnology, Institute of  
6   Hydrobiology, Innovation Academy for Seed Design, Chinese Academy of  
7   Sciences, Wuhan 430072, China

8   <sup>2</sup>College of Advanced Agricultural Sciences, University of Chinese Academy of  
9   Sciences, Beijing 100049, China

10   <sup>3</sup>Hubei Hongshan Laboratory, Wuhan 430070, China

11   <sup>&</sup>These authors contributed equally to this work

12   \*Correspondence: [yhsun@ihb.ac.cn](mailto:yhsun@ihb.ac.cn)

13

14   **Key words: translation control, oocyte maturation, Nanog, zebrafish,**  
15   **embryogenesis**

## 16    **Abstract**

17    Many maternal mRNAs are translationally repressed during oocyte maturation  
 18    and spatio-temporally activated during early embryogenesis, which is critical  
 19    for oocyte and early embryo development. By analyzing maternal mutants of  
 20    *nanog* (*Mnanog*) in zebrafish, we demonstrated that Nanog tightly controls  
 21    translation of maternal mRNA during oocyte maturation via transcriptional  
 22    repression of *eukaryotic translation elongation factor 1 alpha 1, like 2*  
 23    (*eef1a1l2*). Loss of maternal Nanog led to defects of egg maturation, increased  
 24    endoplasmic reticulum (ER) stress, and an activated unfold protein response  
 25    (UPR), which was caused by elevated translational activity. We further  
 26    demonstrated that Nanog, as a transcriptional repressor, represses the  
 27    transcription of *eef1a1l2* by directly binding to the *eef1a1l2* promoter during  
 28    oocyte maturation. More importantly, depletion of *eef1a1l2* in *nanog* mutant  
 29    females effectively rescued the elevated translational activity in oocytes, egg  
 30    quality defects, and embryonic defects of *Mnanog* embryos. Thus, our study  
 31    demonstrates that maternal Nanog regulates oocyte maturation and early  
 32    embryogenesis through translational control of maternal mRNA via a novel  
 33    mechanism, in which Nanog acts as a transcriptional repressor to suppress  
 34    transcription of *eef1a1l2*.

35

36

## 37 Introduction

38 During oocyte development, lots of maternal mRNAs are transcribed and  
39 accumulated, and translational activation or repression of maternal mRNA in  
40 temporal and spatial determines oocyte development, maturation, and early  
41 embryogenesis. Translation of many maternal mRNAs is repressed during  
42 oocyte development (Evans and Hunter, 2005; Pique et al., 2008; Gosden and  
43 Lee, 2010), and maintenance of translational arrest of maternal mRNA is  
44 essential for normal oocyte development and maturation (Richter and Lasko,  
45 2011; Yarunin et al., 2011). Failure of translational repression of maternal  
46 mRNAs resulted in various developmental defects, including apoptosis of  
47 oogenesis, impaired oocyte maturation and unsuccessful early embryonic  
48 development.

49 Various mechanisms of translational control have been described using  
50 different animal models. In zebrafish, the RNA-binding protein Zar1 binds to  
51 zona pellucida (ZP) mRNAs and represses translation of the ZP gene during  
52 oogenesis, loss of Zar1 induces oocyte apoptosis and ovary degeneration  
53 (Miao et al., 2017). An RNA-binding protein Ybx1 associates with processing  
54 body components and repress global translation activity during early  
55 embryogenesis (Sun et al., 2018). In *Drosophila*, translation of many germ  
56 cell-specific mRNAs are repressed by RNA-binding proteins during oocyte  
57 maturation. Germline RNA, *oskar* and *pgc*, are targeted by Bruno or Pumilio at  
58 the 3'-untranslated region (UTR) and translationally repressed during

59 oogenesis, and mutation of RNA-binding sites results in precocious translation  
60 and mislocalization of mRNA (Kim-Ha et al., 1995; Snee et al., 2008; Flora et  
61 al., 2018). Me31B mediates the translational silencing of both maternal  
62 mRNAs during the maternal-to-zygotic transition (MZT) and oocyte-localizing  
63 RNAs in the transport process to oocyte (Nakamura et al., 2001; Wang et al.,  
64 2017). During the transport of *nanos* mRNA to oocyte, the failure of  
65 translational repression of *nanos* mRNA by Smaug would lead to ectopic  
66 translation of *nanos* and defects of anteroposterior axis formation (Dahanukar  
67 and Wharton, 1996; Smibert et al., 1996; Smibert et al., 1999). To date, the  
68 studies of translational repression in oogenesis have focused mainly on the  
69 posttranscriptional regulation, in which the translational repressors are mainly  
70 RNA-binding proteins. It remains elusive whether there is a general  
71 translational repressor that regulates the translation of maternal mRNAs at a  
72 global level in oocytes.

73 Nanog is known for its prominent function as a regulator of pluripotency in  
74 embryonic stem cells (Mitsui et al., 2003; Boyer et al., 2005; Loh et al., 2006)  
75 and reprogramming of somatic cells to the pluripotent state (Takahashi and  
76 Yamanaka, 2006; Silva et al., 2009). In zebrafish, Nanog has been shown to  
77 be a transcriptional activator to play a central role in regulating early  
78 embryogenesis. For instance, maternal Nanog mediates endoderm formation  
79 through the Mxtx2-Nodal signaling (Xu et al., 2012), and is required for both  
80 extra-embryonic development (Gagnon et al., 2017) and embryonic

81 architecture formation (Veil et al., 2018). During the maternal-to-zygotic  
82 transition (MZT), the maternally provided transcription factors, Pou5f3, SoxB1,  
83 and Nanog coordinately open up chromatin to initiate zygotic genes activation  
84 (Lee et al., 2013; Veil et al., 2019; Palfy et al., 2020). Our recent study shows  
85 that Nanog represses the global activation of maternal  $\beta$ -catenin activity to  
86 safeguard the dorsal-ventral axis formation (He et al., 2020). However, as a  
87 strongly maternally expressed gene, the role of Nanog in oocyte development  
88 and maturation is still unknown.

89 In this study, we found that the absence of maternal *nanog* led to various  
90 developmental defects in oocytes and early embryos. Our study demonstrates  
91 the global translational activity is greatly enhanced in *nanog* mutant oocytes  
92 and maternal *nanog* mutant (*Mnanog*) embryos, due to the transcriptional  
93 activation of *eukaryotic translation elongation factor 1 alpha 1, like 2 (eef1a1/2)*  
94 during oocyte maturation. We further show that maternal depletion of *eef1a1/2*  
95 significantly rescues the developmental defects of *nanog* mutant oocytes and  
96 early development of *Mnanog* embryos. Thus, our study reveals a novel role  
97 for zebrafish Nanog as a general translational repressor through transcriptional  
98 repression of *eef1a1/2* in oocyte maturation.

99

100

# 101     **Results**

## 102     **Maternal *nanog* is required for oocyte maturation and early embryonic** 103     **development**

104     We have obtained *nanog* mutant using TALEN technology and addressed its  
105     critical role in regulating dorsal formation through interfering with TCF factors  
106     in previous studies (He et al., 2015; He et al., 2020). Through analyzing the  
107     phenotype of *Mnanog* embryos, we found that the *Mnanog* embryos showed  
108     slow epibolic movement, resulting in the accumulation of blastomere cells at  
109     the animal pole at gastrulation stage (Fig. 1A), which is similar to the  
110     phenotype of maternal and zygotic mutant of *nanog* (MZ*nanog*) (He et al.,  
111     2020). Comparing the size of *Mnanog* and WT embryos at 15 minutes post  
112     fertilization (mpf), the *Mnanog* embryos showed significantly shorter chorion  
113     diameter and oocyte diameter than WT embryos (Fig. 1B-D). In addition, we  
114     analyzed the activation phenotype of mutant egg by monitoring the cortical  
115     granule (CG) exocytosis and cytoplasmic streaming. Fluorescein-conjugated  
116     *Maclura pomifera* lectin was used to label CGs to assess CG exocytosis in  
117     activated eggs. Compared with WT eggs, *nanog* mutant eggs showed  
118     abundantly retained CGs (Fig. 1E) at 10 minutes post activation (mpa).  
119     CellTracker™ CM-Dil Dye was injected into the yolk of *Mnanog* and WT  
120     embryo to monitor cytoplasmic streaming. In WT embryos, vigorous  
121     cytoplasmic movement toward the animal pole was recorded (Movie 1). In  
122     contrast, *Mnanog* embryos showed sluggish cytoplasmic streaming (Movie 2).

123 These results indicate that maternal Nanog is essential for egg activation and  
124 early embryonic development.

125 Moreover, the TUNEL assay showed apoptotic signals appeared in  
126 Balbiani bodies and the cytoplasm of early-stage mutant oocytes, but not in  
127 WT oocytes (Fig. S1A). Mitochondria are enriched in the Balbiani body and  
128 also present throughout the oocyte cytoplasm (Marlow and Mullins, 2008;  
129 Jamieson-Lucy and Mullins, 2019), thus *nanog* deficiency induced the  
130 mitochondrial apoptosis during oocyte maturation. Besides, robust  
131 active-Caspase3 signals was also detected in *Mnanog* embryos but not WT  
132 embryos at 75% epiboly stage (Fig. S1B). These data demonstrate *nanog*  
133 depletion induces the oocyte apoptosis and the death of early embryonic cells.

134 Through morphological and histological analyses, we found the  
135 gonadosomatic index (GSI; gonad weight/body weight X 100%) was  
136 significantly reduced in *nanog*<sup>-/-</sup> compared to WT females (Fig. 1F, G),  
137 indicating defects of oocyte maturation in *nanog* mutants. To furtherly  
138 characterize the defects of oocyte maturation of *nanog* mutant, stage IV  
139 oocytes were isolated and treated with 17 $\alpha$ ,20 $\beta$ -dihydroxy-4-pregnen-3-one  
140 (DHP) to determine the percentage of germinal vesicle breakdown (GVBD) *in*  
141 *vitro*. After 2 hours incubation, the percentage of GVBD in *nanog* mutant  
142 oocytes is 15.5%, which is significantly lower than that in WT oocytes (72.4%)  
143 (Fig. 1H, I). Moreover, the *nanog* mutant stage V oocyte showed less  
144 transparent than WT (Fig. 1J). During the oocyte maturation, the major yolk

145 proteins undergo cleavage and change the appearance of oocyte from opaque  
146 to transparent (Dosch et al., 2004). So we compared the composition of the  
147 higher and lower molecular weight yolk proteins (HYP and LYP) from stage III  
148 to stage V oocytes, to evaluate the yolk protein cleavage level. In stage III  
149 oocytes, the HYP/LYP ratio were even lower in *nanog* mutant than in WT,  
150 whereas the ratio was greatly decreased in WT stage V oocytes than in  
151 mutants (Fig. 1K). These results suggested the deficiency of yolk protein  
152 cleavage during maturation of *nanog* mutant oocytes. In addition, we also  
153 generated a transgenic line of *Tg(CMV:nanog-myc)* in *nanog* homozygous  
154 background. Immunofluorescence staining showed Nanog is strongly  
155 expressed in early oocytes using anti-Myc antibody (Fig. S1C). Moreover, this  
156 overexpression of *nanog* could rescue the early developmental defects of  
157 *Mnanog* (Fig. S1D), demonstrating that oocyte maturation defect and early  
158 embryonic defect were caused by deficiency of Nanog. Therefore, we  
159 conclude that loss of maternal *nanog* leads to pleiotropic defects of oocyte  
160 maturation and early embryonic development.

161

## 162 **Loss of maternal *nanog* elevates the global translation level**

163 In order to understand the molecular mechanism of Nanog regulating oocyte  
164 maturation, we quantitatively compared proteomes of *nanog* mutant eggs with  
165 WT using isobaric tags for relative and absolute quantitation (iTRAQ)  
166 technology. More than 1600 proteins were identified in eggs from the two



167 genotypes. The identified proteins were classified using COG database  
168 (Clusters of Orthologous Groups of proteins), and two top categories are  
169 involved in the protein translation-related biological process (cluster J and O)  
170 (Fig. S2A). Compared the mutant with WT, 67 proteins show differential  
171 expression ( $P < 0.05$ ) (S1Table), and 39 proteins were increased in mutant eggs  
172 (Fig. S2B). Gene ontology analysis of the upregulated proteins showed that  
173 one of the most significant enriched biological processes is translation  
174 elongation factor activity (Fig. S2C). Gene-Concept Network showed four  
175 elongation factors were enriched (Fig. S2D). These results imply that the  
176 global translation activity is elevated in *nanog* deficiency eggs.

177 To verify this speculation, we assessed the translation activity of *Mnanog*  
178 embryos at early developmental stage. The mCherry reporter mRNA was  
179 injected into one-cell stage WT and *Mnanog* embryos together with the same  
180 amount of GFP protein. The injected embryos were imaged under a  
181 fluorescence microscope at later stages and fluorescence levels were  
182 measured. The GFP protein acted as the loading control for injection.  
183 Fluorescence measurement showed that the reporter mRNA translation level  
184 was significantly higher in *Mnanog* embryos (Fig. 2A, B). Using western  
185 blotting analysis, we confirmed the increase of mCherry reporter translation in  
186 maternal *nanog*-depleted embryos (Fig. 2C, D). More interesting is, we treated  
187 the stage IV mutant oocytes with an inhibitor of translation initiation factor,  
188 *eif4a*, and determined the percentage of GVBD in vitro. After 2 hours

189 incubation, the percentage of GVBD was remarkably increased from 10.4% to  
190 28.3% in mutant oocytes (Fig. S2E, F). Taken together, these results suggest  
191 that Nanog is necessary for repressing the global translation of maternal  
192 mRNAs during oocyte maturation and early embryonic development.

193

# 194 **Nanog depletion triggers ER stress and the unfolded protein response** 195 **(UPR)**

196 The endoplasmic reticulum (ER) functions as a crucial machinery for protein  
197 synthesis, modification and trafficking in eukaryotic cells. Under ER stress,  
198 cells activate the UPR to alleviate ER burden by reducing protein translation,  
199 increasing protein degradation and generating additional chaperones to assist  
200 protein folding. Therefore, ER stress and the UPR are often associated with  
201 aberrant translational derepression (Kaufman, 2002; Miao et al., 2017). The  
202 UPR functions through three major pathways, initiated by three ER-localized  
203 transmembrane proteins, such as protein kinase RNA-like ER kinase (PERK),  
204 activating transcription factor 6 (ATF6), and Inositol-requiring enzyme 1 (IRE1),  
205 to maintain ER homeostasis (Hetz, 2012). Normally, the N-terminal of these  
206 transmembrane ER proteins are held by ER chaperone Hspa5 (also termed  
207 Grp78 or Bip), preventing their aggregation. When misfolded proteins  
208 accumulate, Hspa5 releases, allowing aggregation of these transmembrane  
209 signaling proteins, and launching the UPR (Rao and Bredesen, 2004; Shen et  
210 al., 2004; Schroder and Kaufman, 2005). Activation of PERK upregulates the

211 expression of CCAAT-enhancer-binding protein homologous protein (CHOP),  
 212 which induces cell apoptosis and death (Oyadomari and Mori, 2004; Iurlaro  
 213 and Muñoz-Pinedo, 2016). We detected the transcriptional level and protein  
 214 level of *hspa5* and CHOP-encoding gene *ddit3* in mutant ovary, found that both  
 215 transcription and translation of *hspa5* and *ddit3* are increased in *nanog*<sup>-/-</sup> ovary  
 216 (Fig. 2, E-G). TUNEL assay also showed obvious apoptosis signal in mutant  
 217 ovary (Fig. S1A). Due to lack of specific antibodies against zebrafish ATF6 and  
 218 IRE1A, we detected the mRNA expression of *atf6* and *ire1a*, and discovered  
 219 that both of *atf6* and *ire1a* expression were increased in mutant oocytes (Fig.  
 220 2H, I). Since phosphorylated ribosomal protein S6 (pS6) is considered  
 221 an indicator of active protein synthesis (Biever et al., 2015; Meyuhas, 2015),  
 222 we also detected the expression level of total S6 and pS6, and found that the  
 223 pS6 level was significantly increased in *nanog* mutant ovary (Fig. 2J, K). Finally,  
 224 we used PERK inhibitors (GSK2606414 and ISRIB) to treat *nanog* mutant  
 225 oocytes and determined the occurrence of GVBD. In both treatments, the  
 226 percentage of GVBD of mutant oocytes were recovered (Fig. 2L, M). These  
 227 results demonstrate that loss of *nanog* triggers ER stress and UPR and thus  
 228 leads to failure of oocyte maturation.

229

### 230 **Loss of maternal Nanog up-regulates *eef1a1/2* transcription level**

231 To find out the molecular mechanism responsible for Nanog regulating  
 232 translation activity in early embryos, we conducted RNA sequencing (RNA-seq)

analysis between *nanog* mutant eggs and WT eggs (accession number: PRJNA633216). A total of 207 genes are differentially expressed between mutant and WT eggs, with 102 upregulated genes and 105 downregulated genes in mutant eggs. Among the upregulated genes, the difference of *eukaryotic elongation factor 1 alpha 1, like 2 (eef1a1l2)* is among the most significant ones (Fig. 3A). The eEF1A1l2 is a major subunit of the translation elongation factor 1 complex (eEF1), which plays a central role in protein synthesis by delivering aminoacyl-tRNAs to the elongating ribosome (Sasikumar et al., 2012). RPKM calculation and visualization of RNA-seq reads mapped to the *eef1a1l2* showed significant upregulation of *eef1a1l2* in mutant eggs (Fig. S3A, B). Reverse-transcription quantitative PCR (RT-qPCR) further proved that the transcription of *eef1a1l2* was significantly increased in *nanog* mutant oocytes at five different stages and in early embryonic developmental stages (Fig. 3B, S3C). In situ hybridization of ovary cryosection also showed increased expression of *eef1a1l2* in *nanog* mutant (Fig. 3C). In contrast, transgenic overexpression of *nanog* significantly decreased the high expression levels of *eef1a1l2* in mutant oocytes (Fig. 3B, C). These data indicate that *nanog* deficiency led to strong transcriptional activation of *eef1a1l2* during oocyte maturation.

To verify the transcriptional inhibition of *eef1a1l2* by Nanog, wildtype *nanog* or a constitutive repressor type *nanog* (Engrailed fusion with Nanog homeodomain, En-*nanog*) (He et al., 2020) was overexpressed and the

transcription of *eef1a1l2* was measured at shield stage. Both in situ hybridization and RT-qPCR analysis showed that the expression of *eef1a1l2* was significantly reduced in both *nanog* and En-*nanog* overexpressed-embryos (Fig. 3D, E), suggesting that Nanog acts as a transcriptional repressor on the regulation of *eef1a1l2*. To clarify whether Nanog directly bind to the promoter region of *eef1a1l2* to repress its transcription, a chromatin immunoprecipitation (ChIP) assay was conducted. Ovaries of *Tg(CMV:nanog-myc)* at 6mpf were dissected and ChIP was performed using anti-Myc antibody. The precipitated chromatin was then analyzed by PCR using primer pairs that could amplify fragments of *eef1a1l2* promoter. A fragment of the *rp15b* exon amplified by a specific primer pair was used as control (Belting et al., 2011). As shown in Fig. 3F, promoter fragment of *eef1a1l2* was significantly enriched in the immunoprecipitated while no enrichment of the control genomic region *rp15*. Thus, this result demonstrates that Nanog directly binds to the promoter of *eef1a1l2* to inhibit its transcription. All these data illustrate that Nanog directly inhibits the transcription of *eef1a1l2* and depletion of *nanog* leads to significantly increased expression of *eef1a1l2*.

272

### 273 **Deficiency of eEF1A1l2 ameliorates impaired oocyte maturation of *nanog*** 274 **mutants**

275 We then generated homozygous mutant of *eef1a1l2* and two types of *eef1a1l2*  
276 mutants were obtained and neither of them showed obvious defect (Fig. S4),

277 and we used the *ihb99* allele for subsequent study. To determine if *Nanog*  
278 promotes oocyte maturation through suppression of *eef1a1l2*, we generated  
279 double homozygous mutant of *nanog* and *eef1a1l2* and studied whether  
280 depletion of *eef1a1l2* could ameliorate the oocyte maturation defect of *nanog*  
281 mutant. Through morphological analysis, we found double maternal mutant  
282 (*Mnanog*, *Meef1a1l2*) showed increased embryo chorion diameter and oocyte  
283 diameter at 15 mpf, compared to *Mnanog* embryos (Fig. 4A-C). The process of  
284 cortical granule (CG) exocytosis in double mutant eggs (*nanog*, *eef1a1l2*) were  
285 also comparable to WT at 10 mpa, which showed less retained CGs than  
286 *nanog* mutant (Fig. 4D). Moreover, cytoplasmic streaming labeled by  
287 CM-Dil Dye in double maternal mutant embryo (*Mnanog*, *Meef1a1l2*) showed  
288 vigorous cytoplasmic movement, similar to the WT (Movie 3). These results  
289 indicate that depletion of *eef1a1l2* rescues the egg activation defect of *nanog*  
290 mutant.

291 Therefore, we further examined the oocyte maturation improvement in  
292 double mutant. Morphologically, The GSI was increased in double mutant  
293 (*nanog*<sup>-/-</sup>, *eef1a1l2*<sup>-/-</sup>) female, compared to *nanog*<sup>-/-</sup> (Fig. 4E, F). The double  
294 mutant eggs showed more transparent than *nanog* mutant, similar to WT (Fig.  
295 4G). The altered ratio of the higher and lower molecular weight yolk proteins  
296 (HYP and LYP) from stage III oocytes to stage V oocytes in double mutant  
297 confirmed this conclusion (Fig. 4H). The % GVBD was also remarkably  
298 increased in double mutant oocytes (Fig. 4I, J). These results together indicate

299 that Nanog promotes oocyte maturation through suppressing the expression of  
300 *eef1a1/2* in oocyte.

301

### 302 **Depletion of *eef1a1/2* alleviates the ER stress and UPR in *nanog* mutant** 303 **oocyte**

304 Since depletion of *eef1a1/2* could ameliorates the oocyte maturation defect of  
305 *nanog* mutant, we wondered the eEF1A1/2 depletion on alleviating of ER  
306 stress. We addressed the mRNA expression level of ER stress-associated  
307 genes, found that the increased expression of *hspa5*, *ddit3*, *atf6* and *ire1a* in  
308 *nanog* mutant ovary were all restored in *nanog* and *eef1a1/2* double mutant  
309 (Fig. 5A-D). IRE1 is a unique RNase which removes an internal 26 nucleotides  
310 from X-box binding protein 1 (XBP1) mRNA transcripts in the cytoplasm and  
311 activates gene expression involved in protein folding and degradation, thus the  
312 splicing of XBP1 mRNA has been established as a common indicator of ER  
313 stress (Shen et al., 2001; Yoshida et al., 2001; Li et al., 2015). We detected the  
314 altered splicing of *xbp1* in ovary of mutant and WT, discovered the splicing  
315 ratio of *xbp1* was increased in *nanog* mutant ovary, and this excessive splicing  
316 was reduced in double mutant ovary (Fig. 5E, F).

317 To observe organelle changes that may accompany response to ER stress,  
318 ultrastructure analysis using transmission electron microscopy (TEM) was  
319 performed in stage I oocytes of WT, *nanog* mutant, and double mutant. The  
320 WT oocytes showed normal morphology of ER, Golgi apparatus and

321 mitochondria (Fig. 5G, a and d). However, *nanog* mutant oocytes showed  
 322 disruption of Golgi apparatus, including swelling of Golgi apparatus, dilated  
 323 and disintegrated vesicles, and collapse of Golgi complex (Fig. 5G, b, white  
 324 arrowheads). *nanog* mutant oocytes also showed incompact and swollen  
 325 mitochondria (Fig. 5G, e, yellow arrowheads), as well as evident lysosome  
 326 distribution (Figure 5G, e, red arrowheads). In contrast, *nanog* and *eef1a1l2*  
 327 double mutant showed well structure of ER, Golgi apparatus and mitochondria  
 328 (Figure 5G, c, f). These data demonstrate that depletion of *eef1a1l2* alleviates  
 329 the ER stress and UPR in *nanog* mutant, indicating that transcriptional  
 330 activation of *eef1a1l2* in *nanog* mutant oocytes inducing ER stress and UPR,  
 331 thus leading to defects of oocyte maturation.

332

### 333 **Depletion of *eef1a1l2* rescues early embryonic development defect of** 334 ***nanog* mutant**

335 Given that depletion of *eef1a1l2* could rescue the oocyte maturation defect and  
 336 alleviate the ER stress/UPR, we wondered the rescue effect of depletion of  
 337 *eef1a1l2* on early embryonic development defect. Due to the translation  
 338 elongation role of eEF1A1l2, we firstly assessed the translation level of double  
 339 mutant. mCherry mRNA reporter and GFP protein were co-injected at one-cell  
 340 stage in WT, *Mnanog*, and *Mnanog,Meef1a1l2* embryos. Fluorescence  
 341 intensity of mCherry was measured at 4 hpf. Fluorescence measurement  
 342 showed that the reporter translation level was significantly reduced in



343 *Mnanog*,*Meef1a1l2* embryos (Fig. S5A, B), suggesting the elevated translation  
344 level of *nanog* mutant was decreased by depletion of *eef1a1l2*.

345 Next, we examined the early embryonic development phenotype of double  
346 mutant. The morphological phenotypes of WT, *Mnanog* (*nanog*<sup>-/-</sup> female cross  
347 with WT male), *Mnanog*,*Meef1a1l2* (*nanog*<sup>-/-</sup>,*eef1a1l2*<sup>-/-</sup> female cross with WT  
348 male), *Mnanog*,*MZeef1a1l2* (*nanog*<sup>-/-</sup>,*eef1a1l2*<sup>-/-</sup> female cross with *eef1a1l2*<sup>-/-</sup>  
349 male), and *Mnanog*,*Zeef1a1l2* (*nanog*<sup>-/-</sup>,*eef1a1l2*<sup>+/-</sup> female cross with  
350 *eef1a1l2*<sup>-/-</sup> male and *nanog*<sup>+/-</sup>,*eef1a1l2*<sup>-/-</sup> embryos were genotyped) were  
351 recorded at 0.2, 8, 12 and 24 hpf, respectively. As described in Fig. 1A,  
352 blastomere cells stacked at the animal pole and unable to complete the  
353 gastrulation in *Mnanog* embryos. Until 24 hpf, *Mnanog* embryos still showed  
354 abnormal shapes and died gradually (Fig. 6A). Surprisingly, either getting rid of  
355 maternal increased *eef1a1l2* in *Mnanog*,*Meef1a1l2* embryos, or eliminating  
356 both maternal and zygotic increased *eef1a1l2* in *Mnanog*,*MZeef1a1l2* embryos,  
357 could effectively rescue the developmental defects of *Mnanog* (Fig. 6A).  
358 *Mnanog*,*Meef1a1l2* and *Mnanog*,*MZeef1a1l2* embryos both exhibited  
359 ameliorated epiboly movement at gastrulation stage and improved axial  
360 formation excepting telencephalon defect at prim-stage. However,  
361 *Mnanog*,*Zeef1a1l2* embryos only lacking the zygotic *eef1a1l2* exhibited similar  
362 phenotype with *Mnanog* (Fig. 6A), indicating that the maternally provided  
363 *eef1a1l2* mRNA in *Mnanog*,*Zeef1a1l2* still led to developmental failure. In  
364 summary, only if *eef1a1l2* was completely disrupted in the *nanog* mutant

oocytes, the *Mnanog*,*Meef1a1l2* or *Mnanog*,*MZeef1a1l2* embryos displayed rescued early embryonic development. These data indicate that support the c maternal activation of *eef1a1l2* in *nanog* mutant oocytes not only leads to oocyte maturation defects, but also results in early developmental defects of *Mnanog* embryos.

Furthermore, we investigated the rescue effects using a set of molecular markers representing different functions of Nanog in early development. Several studies have proved that maternal Nanog directly activates *mxtx2* to regulate endoderm and extraembryonic formation through Nanog-*mxtx2*-Nodal pathway (Xu et al., 2012; Gagnon et al., 2018; Veil et al., 2018). We confirmed that the expression of *mxtx2* was absent in *Mnanog*, while the disappearance of *mxtx2* transcripts could be restored in *Mnanog*,*Meef1a1l2* (Fig. 6B, S5C). During zebrafish zygotic genome activation (ZGA), together with Pou5f3 and SoxB1, maternal Nanog initiates the transcription of the first major wave of zygotic genes and directly activates microRNA miR-430, maternal mRNAs were then cleared by miR-430 at the post-ZGA (Giraldez et al., 2006; Lee et al., 2013). The expression of zygotic genes, miR-430 and *btf*, failed to be activated, and maternal mRNA *sod1*, which is targeted by miR-430, also failed to be removed at post-ZGA in *Mnanog* (Fig. 6B, S5D-F). In contrast to rescue of *mxtx2* expression, the defects of ZGA and maternal mRNA clearance could not be rescued in *Mnanog*,*Meef1a1l2* embryos (Fig. 6B, S5D-F). These results illustrate that during oogenesis, maternal Nanog safeguards the oocyte

387 maturation by suppression the transcriptional activation of *eef1a1l2* as a  
388 transcriptional repressor, and during early embryogenesis, the transcriptional  
389 suppression of *eef1a1l2* by Nanog is mainly required for transcription initiation  
390 of *mxtx2* and YSL formation.

391 All these results deciphered a following molecular picture: during oocyte  
392 maturation and early embryogenesis (Fig. 6C). During WT oogenesis, Nanog  
393 acts as a transcriptional repressor, with certain co-repressors, directly inhibits  
394 the transcription of eukaryotic translation elongation factor, *eef1a1l2*,  
395 contributing to the translational control in oocytes. After fertilization, Nanog  
396 acts as a transcriptional activator, together with Pou5f3 and SoxB1, to initiate  
397 zygotic genome activation. In the oocytes produced by *nanog*<sup>-/-</sup> females, the  
398 transcriptional inhibition of *eef1a1l2* is absent, ectopic maternal proteins are  
399 translated and accumulated, thus inducing ER stress and excessive UPR, and  
400 leading to oocyte maturation defects. The embryos fertilized from the *nanog*<sup>-/-</sup>  
401 defective eggs failed to undergo normal gastrulation. In the oocytes produced  
402 by *nanog*<sup>-/-</sup>, *eef1a1l2*<sup>-/-</sup> females, however, the translation level of maternal  
403 mRNAs is mitigated owing to the lack of functional eEF1A1l2, and ER stress  
404 and UPR are alleviated, therefore leading to a normal oocyte maturation.  
405 Therefore, it is likely that Nanog shifts from a transcriptional repressor to a  
406 transcription activator during oocyte-to-zygote transition (OZT), which are both  
407 essential for early embryogenesis.

408

## 409 Discussion

410 The function of Nanog at early embryonic developmental stages has been well  
 411 characterized in previous studies(Veil et al., 2018; Veil et al., 2019; He et al.,  
 412 2020; Palfy et al., 2020). However, as a maternal expressed gene, its role in  
 413 oocyte development and maturation is still unknown. In this study, we revealed  
 414 that zebrafish Nanog is essential for oocyte maturation, which function has a  
 415 lasting effect on early embryogenesis. Loss of maternal Nanog causes  
 416 impaired oocyte maturation, deficient egg activation, and early embryo  
 417 developmental failure. Impaired oocyte maturation correspondingly tends to  
 418 produce poor-quality egg. We have compared the *nanog* expression level in  
 419 good-quality egg and poor-quality egg and found that *nanog* expression is  
 420 significantly decreased in poor-quality egg (Fig. S6), suggesting that Nanog  
 421 might be a new factor for oocyte quality assessment. Mechanistically, Nanog  
 422 transcriptionally represses the expression of translation elongation factor  
 423 *eef1a1l2* to maintain a translational control state during oocyte maturation. In  
 424 contrast, in *nanog* mutant oocytes, ectopic transcriptional activation of  
 425 *eef1a1l2* elevates global translation activity and causes ER stress and UPR.  
 426 Depletion of *eef1a1l2* could rescue the oocyte maturation defects and  
 427 embryonic defects of *nanog* mutant. Taken together, our results delineate the  
 428 mechanisms underlying a general translation repressor role of Nanog during  
 429 oocyte maturation.

430 Maternal mRNAs synthesized in oocyte initiate the development of future

generations. Some maternal mRNAs are either somatic or germline determinants and must be translationally repressed until embryogenesis (Richter and Lasko, 2011; Flora et al., 2018). Previous studies have provided numerous examples of how sequence-specific regulators, mostly RNA-binding proteins, maintain translational repression levels of mRNAs containing targeted cis-regulatory elements post-transcriptionally in gametogenesis and early embryogenesis (Kugler and Lasko, 2009; Kotani et al., 2013; Winata et al., 2017; Sun et al., 2018). In this study, we showed a transcriptional factor, Nanog, transcriptionally inhibits the expression of a translation elongation factor, eEF1A1I2 consequently controls the global mRNA translation activity during oocyte maturation. This translation repressive manner is realized through regulating the activity of a translation machinery, which is more global and independent on the sequence specificity of mRNA. Thus, this study revealed a novel translational control mechanism regulated by Nanog to promote oocyte maturation and early embryogenesis.

The genes who are not transcribed in oocyte and mature eggs are considered as non-maternal genes, or zygotic genes. In theory, the transcription of non-maternal genes should be suppressed in oocyte to safeguard the oocyte maturation and early embryo patterning. The abnormal activation and expression of non-maternal genes will change the oocyte cell fate, affect egg quality, even lead to the apoptosis of oocyte. According to the expression pattern of *eef1a1/2* addressed during oocyte maturation and early

embryonic development in WT (Fig. 3, S4), we found that *eef1a1/2* has no maternal expression in oocytes, indicating *eef1a1/2* is a non-maternal gene and not employed during oocyte maturation. However, *eef1a1/2* is precociously transcribed in *nanog* mutant oocytes, which leads to the over-activation of global translation activity, further results in the impaired oocyte maturation. This finding implies us Nanog safeguards oocyte maturation and early embryogenesis possibly by suppression the transcriptional activation of non-maternal genes.

Studies in human and mouse embryonic stem cells (ESC) revealed Nanog acts as both transcriptional activator and transcriptional repressor (Boyer et al., 2005; Liang et al., 2008). As a transcriptional activator, Nanog cooperating with Pou5f3 and Sox2, transcriptionally activates the expression of genes responsible for stem cell self-renew and pluripotency maintenance, while as a transcriptional repressor, Nanog associates with repression complexes and transcriptionally represses the expression of genes related to differentiation and development. In this study, we concluded that Nanog acts as a transcriptional repressor to suppress the transcription of *eef1a1/2* and speculated that Nanog safeguards oocyte maturation by suppressing *eef1a1/2* during oocyte development in zebrafish. However, zebrafish Nanog is well-known for acting as a transcription activator in zygotic genome activation (ZGA) and shaping the embryo during gastrulation. For instance, together with Pou5f3 and SoxB1, Nanog initiates the zygotic gene activation (ZGA), of which

475 miR-430 is directly activated by Nanog and responsible for clearance of  
 476 maternal mRNA during MZT (Lee et al., 2013). Further studies proved Nanog  
 477 binds to the high nucleosome affinity regions (HNARs) center and opens  
 478 chromatin with Pou5f3 and Sox19b synergistically, primes genes for activity  
 479 during ZGA in zebrafish (Veil et al., 2019; Palfy et al., 2020). Nanog directly  
 480 activates *mxtx2* and regulates the extraembryonic tissue and and embryonic  
 481 architecture formation (Xu et al., 2012; Gagnon et al., 2018; Veil et al., 2018).  
 482 Quantitative imaging also reveals Nanog cooperates with Pou5f3 to promote  
 483 ventral fate (Perez-Camps et al., 2016). These studies illustrate that Nanog  
 484 switches from transcriptional repressor to transcriptional activator during  
 485 oocyte-to-zygote transition. As a homeodomain protein, Nanog binds with  
 486 target genes at homeobox domain, while which repressive partner interacts  
 487 with Nanog to exhibit gene silence function in oocyte still needs to be further  
 488 investigated.  
 489

## Methods and Materials

### Zebrafish maintenance

All the zebrafish used in this study were maintained and raised as previously described (Westerfield, 1995) at the China Zebrafish Resource Center of the National Aquatic Biological Resource Center (CZRC-NABRC, Wuhan, China, <http://zfish.cn>). The Wildtype (WT) embryos were collected by natural spawning from AB strain. Oocyte developmental stages were classified according to previous studies (Selman et al., 1993; Lubzens et al., 2010). Developmental stages of mutant embryos were indirectly determined by observation of WT embryos born at the same time and incubated under identical conditions. The experiments involving zebrafish were performed under the approval of the Institutional Animal Care and Use Committee of the Institute of Hydrobiology, Chinese Academy of Sciences under protocol number IHB2014-006.

### Double mutant generation of *nanog* and *eef1a1l2*

*Mnanog* was generated by crossing *nanog*<sup>-/-</sup> female with WT male as previously described (He et al., 2015; He et al., 2020). *eef1a1l2* mutant was generated in *nanog* mutant background using CRISPR/Cas9. The gRNA target and PAM sequence (underlined) of *eef1a1l2* is 5'-GGCCACCTCATTACAGTGTGG-3', pT3TS-zCas9 was used for Cas9 mRNA transcription; capped Cas9 mRNA was generated using T3 mMessage



Machine kit (AM1344, Ambion). gRNA was generated using in vitro transcription by T7 RNA polymerase (Promega, USA). Cas9 mRNA and gRNA were co-injected into embryos crossed by *nanog*<sup>+/-</sup> female and *nanog*<sup>-/-</sup> male at one-cell stage. *Mnanog/Meef1a1l2* was obtained by crossing *nanog*<sup>-/-</sup>,*eef1a1l2*<sup>-/-</sup> female with WT male. The primers used for mutant screening are listed in S2 Table.

518

### 519 **Morphological analysis of ovary and oocyte**

After MS-222 anesthesia, we dissected the intact gonadal tissues from WT, *nanog*<sup>-/-</sup>, and *nanog*<sup>-/-</sup>,*eef1a1l2*<sup>-/-</sup> adult zebrafish (4-months post fertilization) and calculated the gonadosomatic index (GSI; gonad weight/body weight X 100%). For embryos, chorion elevation distance and oocyte diameter were measured at 15 minute-post-fertilization (mpf) using ImageJ. Oocyte diameter was the longest distance in the vertical direction of the animal-vegetal axis. Chorion diameter was the longest length of chorion when it was fully inflated.

527

### 528 **Oocyte isolation, in vitro culture and germinal vesicle breakdown (GVBD)** 529 **assay**

Ovaries were dissected from adult females and transferred into oocyte sorting medium (OSM), made from 90% Leibovitz's L-15 medium (Gibco, USA) and 10% Fetal Bovine Serum (BI, Israel) with 100µg/ml Penicillin-Streptomycin (Gibco, USA). Oocytes were manually separated and divided into five groups

534 based on their size and vitellogenic state: primary growth stage (stage I),  
535 previtellogenic stage (stage II), vitellogenic stage (stage III), full-growth stage  
536 (stage IV) and the oocyte after GVBD in vitro was defined as stage V (mature  
537 oocyte). Ovulated maturation oocyte was defined as egg. Different stages of  
538 oocytes were gently separated using two tweezers in a dish covered with 1%  
539 agarose.

540 Dissociated stage IV oocytes were transferred into oocyte culture medium  
541 (OCM) by gentle pipetting. OCM was made from 90% Leibovitz's L-15 medium  
542 and 10% Fetal Bovine Serum with 1 µg/mL  
543 17α-20β-dihydroxy-4pregnen-3-one (DHP, Cayman, USA). Sorted oocytes  
544 were cultured at 28°C for 2h according to previous study (Nair et al., 2013).  
545 The GVBD rates were determined in a unified standard by ImageJ. The  
546 concentrations of different inhibitors added to OCM were *elf4a* inhibitor  
547 (25ng/µL, SantaCruz, USA), ISRIB (5µM, Selleck, Shanghai), GSK2606414  
548 (50nM, Selleck, Shanghai).

549

#### 550 **Cortical Granules (CGs) staining**

551 Ovulated eggs at 10 minute-post-activation (mpa) in water were collected and  
552 fixed with 4% paraformaldehyde (PFA) overnight for further steps. Cortical  
553 granules were visualized by staining embryos with 50 µg/ml FITC-conjugated  
554 *Maclura pomifera* agglutinin (Vector Laboratories, FL-1341) as previously  
555 described (Mei et al., 2009).

556

## 557 **SDS-PAGE and Coomassie staining**

558 SDS-PAGE and Coomassie staining were performed following the established  
559 protocol (Schagger, 2006). To obtain yolk protein, 10 oocytes were cleaved in  
560 500 µL TNE buffer, made from 10 mM Tris-HCl (pH=7.4), 150 mM NaCl, 5 mM  
561 EDTA and 1% Triton X-100. 10 µL lysate was loaded for SDS-PAGE and  
562 Coomassie staining as previously described (Sun et al., 2018). Intensity  
563 measurement was done using ImageJ.

564

## 565 **Western blot analysis**

566 GFP protein was purchased from DIA-AN Biotechnology and 20 pg of GFP  
567 protein per embryo was co-injected at one-cell stage. Injected embryos or  
568 dissected ovaries were homogenized using RIPA (P0013B, Beyotime).  
569 Western blot was carried out as previously described (Ye et al., 2019). Primary  
570 antibodies and dilutions for western blot were GAPDH (2058, DIA-AN, 1:3,000),  
571 mCherry (BE2026, Easybio, 1:2,000), GFP (2057, DIA-AN, 1:2,000), Hspa5  
572 (11587-1-AP, Proteintech, 1:2,000), Ddit3 (AC532, Beyotime, 1:2,000), S6  
573 (2217S, CST, 1:1,000), pS6 (2215S, CST, 1:1,000).

574

## 575 **RNA-seq and analysis**

576 Total RNA of ovulated eggs of WT and *nanog* homozygous were extracted  
577 using TRIzol Reagent (Invitrogen) and mRNA was enriched using oligo-dT

578 magnetic beads. First-strand cDNAs (from purified mRNA) was synthesized  
579 using random hexamers. The PCR-amplified cDNA was purified using AMPure  
580 XP beads, then 1  $\mu$ L cDNA was validated using an Agilent 2100 Bioanalyzer.  
581 Sequencing libraries were generated using the Illumina TruSeq RNA sample  
582 preparation kit v2 according to the manufacturer's recommendations.  
583 Clustered library preparations were sequenced on an Illumina HiSeq<sup>TM</sup> 2000  
584 machine and 100 bp single-end reads were generated. Clean reads, with low  
585 quality reads removed from the raw data, were mapped to the zebrafish  
586 GRCz10 reference genome using TopHat2 (Kim et al., 2013). HTSeq v0.6.1  
587 was used to count the read numbers mapped to each gene. Then, the RPKM  
588 of each gene was calculated to determine gene expression levels (Trapnell et  
589 al., 2010). Differential expression analysis was performed using the DESeq  
590 (Anders and Huber, 2010). Genes with an adjusted P-value  $\leq 0.05$  as  
591 calculated by DESeq were considered differentially expressed. The original  
592 RNA-seq data has been deposited to the BioProject with accession number  
593 PRJNA633216.

594

## 595 **Proteomics**

596 Ovulated eggs of WT and *nanog* homozygous were pooled and homogenized  
597 for quantitative proteomic analysis. The iTRAQ analysis was performed as  
598 previously described (Miao et al., 2017). The UniPort proteome sequence for  
599 *Danio rerio* were used for the database searching.

600

## 601 **Chromosome-immunoprecipitation PCR (ChIP-PCR)**

602 Chromatin immunoprecipitation (ChIP) assays were performed with a ChIP  
603 assay kit (Cell Signaling Technology) as described (Wei et al., 2014). Briefly, 2  
604 ovaries of *Tg(CMV:nanog-myc)* at 6mpf were dissected and lysed for ChIP  
605 assay. Immunoprecipitation was carried out using anti-Myc antibody (CST).  
606 The immunoprecipitation of *eef1a1/2* genomic in immunoprecipitated  
607 chromatin was detected by PCR. primers specific for the *eef1a1/2* promoter  
608 region were used and the sequences were listed in S2 Table. The exon of  
609 ribosomal protein *rpl5b* was served as a negative control, and the primers  
610 were 5'-GGGGATGAGTTCAATGTGGAG-3' (forward) and  
611 5'-CGAACACCTTATTGCCAGTAG-3' (reverse) as described (Belting et al.,  
612 2011).

613

## 614 **Transmission electron microscopy (TEM) analysis**

615 Isolated early-stage oocytes from different genotypic ovaries were collected  
616 into a test tube and fixed with 100 µL 2.5% glutaraldehyde at 4°C overnight.  
617 Samples preparation for transmission electron microscopy (TEM) was  
618 according to the previous described (Zhang et al., 2021) and observed under  
619 TEM (Hitachi, HT7700).

620

## 621 **In situ hybridization**

622 PCR-amplified sequences of genes of interest were used as templates for the  
623 synthesis of an antisense RNA probe, labelled with digoxigenin-linked  
624 nucleotides. Whole-mount *In situ* hybridization (WISH) on embryos were  
625 performed as described previously (Thisse and Thisse, 2008). For *in situ*  
626 hybridization on frozen section, adult ovaries were stripped and embedded in  
627 Optimal Cutting Temperature compound (O.C.T. SAKURA) and sectioned at  
628 10 µm. The procedures of hybridization followed a previous study (Zhang et al.,  
629 2020).

630

### 631 **Immunofluorescence**

632 For whole-mount immunofluorescence, embryos were collected and fixed in 4%  
633 PFA for overnight at 4°C. For immunofluorescence on cryosections, sections  
634 were prepared as in situ hybridization and fixed in 4% PFA for 20 min at room  
635 temperature. The procedure of immunostaining on embryos and slides are  
636 referred to previous studies, separately (He et al., 2020; Zhang et al., 2021).  
637 Primary antibodies and dilutions were Cleaved-Caspase3 (#9661, CST,  
638 1:1,000), Myc (#2276, CST, 1:1,000).

639

### 640 **Reverse-transcription quantitative PCR (RT-qPCR)**

641 Total RNA was extracted from indicated samples using TRIzol method. The  
642 RNA was reverse-transcribed with PrimeScript™ RT reagent Kit (Thermo) and  
643 relative abundance of target mRNAs was examined with gene-specific primers.

644 *gapdh* was used as a normalization control. Sequences of PCR primers are  
645 listed in S2 Table. RT-qPCR was performed using the SYBRGreen Super mix  
646 from BioRad (USA) on a BioRad CFX96.

647

#### 648 **Stem-loop RT-PCR of miR-430a**

649 Stem-loop RT-PCR was performed to quantify the expression of miR-430a as  
650 previously described (Chen et al., 2005). Total RNAs were reversely  
651 transcribed using the miR-430a specific primers and U6 was used as internal  
652 control. The PCR primers of miR-430a and U6 used in this study referred to  
653 previous study (He et al., 2020).

654

#### 655 **Terminal deoxynucleotidyl transferase dUTP nick end labeling (TUNEL)** 656 **assay**

657 Ovaries were dissected from 4 months post fertilization WT and *nanog*<sup>-/-</sup> adult  
658 fish and cryosections were prepared as in situ hybridization. The samples were  
659 sectioned at 10 µm thickness. The TUNEL cell death assay was performed  
660 using the In Situ Cell Death Detection Kit (Roche) according to the  
661 manufacturer's instructions. Images were obtained using a laser scanning  
662 confocal microscope (Leica SP8).

663

#### 664 **Statistical analysis**

665 GraphPad Prism 8.3.0 software was used for statistical analyses and statistical

666 graphs. Significance of differences between means was analyzed using  
667 Student's t test. Sample sizes were indicated in the figure legends. Data were  
668 shown as mean  $\pm$  SD. *P* value below 0.05 marked as \*, *P* value below 0.01  
669 marked as \*\*, and *P* value below 0.001 marked as \*\*\*, ns means no significant  
670 difference.

671

## 672 **Acknowledgements**

673 We thank other members of the Sun laboratory for discussions, and Linglu Li  
674 from the China Zebrafish Resource Center for fish raising assistance.

675

## 676 **Competing interests**

677 The authors declare no competing or financial interests.

678

## 679 **Funding**

680 This work was supported by National Natural Science Foundation of China  
681 under grant No 31702323 to MH, and 31671501 to YS.

682

## 683 **Data availability**

684 RNA-seq data in this study have been deposited in SRA under the accession  
685 number PRJNA633216. Raw data of the iTRAQ proteome analyses are  
686 available in iProX under the accession number IPX0004874000.

687



## 688    **References**

- 689    **Anders, S. and Huber, W.** (2010) 'Differential expression analysis for sequence count data',  
690    *Genome Biol* 11(10): R106.
- 691    **Belting, Heinz-Georg, Wendik, Björn, Lunde, Karen, Leichsenring, Manuel, Mössner,**  
692    **Rebecca, Driever, Wolfgang and Onichtchouk, Daria** (2011) 'Pou5f1 contributes to  
693    dorsoventral patterning by positive regulation of vox and modulation of fgf8a expression',  
694    *Developmental Biology* 356(2): 323-336.
- 695    **Biever, A., Valjent, E. and Puighermanal, E.** (2015) 'Ribosomal Protein S6 Phosphorylation  
696    in the Nervous System: From Regulation to Function', *Front Mol Neurosci* 8: 75.
- 697    **Boyer, L. A., Lee, T. I., Cole, M. F., Johnstone, S. E., Levine, S. S., Zucker, J. P., Guenther,**  
698    **M. G., Kumar, R. M., Murray, H. L., Jenner, R. G. et al.** (2005) 'Core transcriptional regulatory  
699    circuitry in human embryonic stem cells', *Cell* 122(6): 947-56.
- 700    **Chen, C., Ridzon, D. A., Broomer, A. J., Zhou, Z., Lee, D. H., Nguyen, J. T., Barbisin, M.,**  
701    **Xu, N. L., Mahuvakar, V. R., Andersen, M. R. et al.** (2005) 'Real-time quantification of  
702    microRNAs by stem-loop RT-PCR', *Nucleic Acids Res* 33(20): e179.
- 703    **Dahanukar, A. and Wharton, R. P.** (1996) 'The Nanos gradient in Drosophila embryos is  
704    generated by translational regulation', *Genes Dev* 10(20): 2610-20.
- 705    **Dosch, Roland, Wagner, Daniel S., Mintzer, Keith A., Runke, Greg, Wiemelt, Anthony P.**  
706    **and Mullins, Mary C.** (2004) 'Maternal Control of Vertebrate Development before the  
707    Midblastula Transition: Mutants from the Zebrafish I', *Developmental Cell* 6(6): 771-780.
- 708    **Evans, T. C. and Hunter, C. P.** (2005) 'Translational control of maternal RNAs', *WormBook*:  
709    1-11.
- 710    **Flora, Pooja, Wong-Deyrup, Siu Wah, Martin, Elliot Todd, Palumbo, Ryan J., Nasrallah,**  
711    **Mohamad, Oligney, Andrew, Blatt, Patrick, Patel, Dhruv, Fuchs, Gabriele and Rangan,**  
712    **Prashanth** (2018) 'Sequential Regulation of Maternal mRNAs through a Conserved cis-Acting  
713    Element in Their 3' UTRs', *Cell Rep* 25(13): 3828-3843.e9.
- 714    **Gagnon, J. A., Obbad, K. and Schier, A. F.** (2018) 'The primary role of zebrafish nanog is in  
715    extra-embryonic tissue', *Development* 145(1).
- 716    **Gagnon, James A., Obbad, Kamal and Schier, Alexander F.** (2017) 'Zebrafish nanog is

717 primarily required in extraembryonic tissue', *Development*.

718 **Giraldez, A. J., Mishima, Y., Rihel, J., Grocock, R. J., Van Dongen, S., Inoue, K., Enright,**

719 **A. J. and Schier, A. F.** (2006) 'Zebrafish MiR-430 promotes deadenylation and clearance of

720 maternal mRNAs', *Science* 312(5770): 75-9.

721 **Gosden, Roger and Lee, Bora** (2010) 'Portrait of an oocyte: our obscure origin', *Journal of*

722 *Clinical Investigation* 120(4): 973-983.

723 **He, M. D., Zhang, F. H., Wang, H. L., Wang, H. P., Zhu, Z. Y. and Sun, Y. H.** (2015) 'Efficient

724 ligase 3-dependent microhomology-mediated end joining repair of DNA double-strand breaks

725 in zebrafish embryos', *Mutat Res* 780: 86-96.

726 **He, Mudan, Zhang, Ru, Jiao, Shengbo, Zhang, Fenghua, Ye, Ding, Wang, Houpeng and**

727 **Sun, Yonghua** (2020) 'Nanog safeguards early embryogenesis against global activation of

728 maternal  $\beta$ -catenin activity by interfering with TCF factors', *PLOS Biology* 18(7): e3000561.

729 **Hetz, C.** (2012) 'The unfolded protein response: controlling cell fate decisions under ER stress

730 and beyond', *Nat Rev Mol Cell Biol* 13(2): 89-102.

731 **Iurlaro, Raffaella and Muñoz-Pinedo, Cristina** (2016) 'Cell death induced by endoplasmic

732 reticulum stress', *The FEBS Journal* 283(14): 2640-2652.

733 **Jamieson-Lucy, A. and Mullins, M. C.** (2019) 'The vertebrate Balbiani body, germ plasm, and

734 oocyte polarity', *Curr Top Dev Biol* 135: 1-34.

735 **Kaufman, Randal J.** (2002) 'Orchestrating the unfolded protein response in health and

736 disease', *The Journal of Clinical Investigation* 110(10): 1389-1398.

737 **Kim-Ha, J., Kerr, K. and Macdonald, P. M.** (1995) 'Translational regulation of oskar mRNA by

738 bruno, an ovarian RNA-binding protein, is essential', *Cell* 81(3): 403-12.

739 **Kim, Daehwan, Pertea, Geo, Trapnell, Cole, Pimentel, Harold, Kelley, Ryan and Salzberg,**

740 **Steven L.** (2013) 'TopHat2: accurate alignment of transcriptomes in the presence of insertions,

741 deletions and gene fusions', *Genome biology* 14(4): R36-R36.

742 **Kotani, T., Yasuda, K., Ota, R. and Yamashita, M.** (2013) 'Cyclin B1 mRNA translation is

743 temporally controlled through formation and disassembly of RNA granules', *J Cell Biol* 202(7):

744 1041-55.

745 **Kugler, J. M. and Lasko, P.** (2009) 'Localization, anchoring and translational control of oskar,

746 gurken, bicoid and nanos mRNA during Drosophila oogenesis', *Fly (Austin)* 3(1): 15-28.

747 **Lee, M. T., Bonneau, A. R., Takacs, C. M., Bazzini, A. A., DiVito, K. R., Fleming, E. S. and**  
748 **Giraldez, A. J.** (2013) 'Nanog, Pou5f1 and SoxB1 activate zygotic gene expression during the  
749 maternal-to-zygotic transition', *Nature* 503(7476): 360-4.

750 **Li, Junling, Chen, Zhiliang, Gao, Lian-Yong, Colorni, Angelo, Ucko, Michal, Fang,**  
751 **Shengyun and Du, Shao Jun** (2015) 'A transgenic zebrafish model for monitoring xbp1  
752 splicing and endoplasmic reticulum stress in vivo', *Mechanisms of Development* 137: 33-44.

753 **Liang, J., Wan, M., Zhang, Y., Gu, P., Xin, H., Jung, S. Y., Qin, J., Wong, J., Cooney, A. J.,**  
754 **Liu, D. et al.** (2008) 'Nanog and Oct4 associate with unique transcriptional repression  
755 complexes in embryonic stem cells', *Nat Cell Biol* 10(6): 731-9.

756 **Loh, Y. H., Wu, Q., Chew, J. L., Vega, V. B., Zhang, W., Chen, X., Bourque, G., George, J.,**  
757 **Leong, B., Liu, J. et al.** (2006) 'The Oct4 and Nanog transcription network regulates  
758 pluripotency in mouse embryonic stem cells', *Nat Genet* 38(4): 431-40.

759 **Lubzens, E., Young, G., Bobe, J. and Cerda, J.** (2010) 'Oogenesis in teleosts: how eggs are  
760 formed', *Gen Comp Endocrinol* 165(3): 367-89.

761 **Marlow, F. L. and Mullins, M. C.** (2008) 'Bucky ball functions in Balbiani body assembly and  
762 animal-vegetal polarity in the oocyte and follicle cell layer in zebrafish', *Dev Biol* 321(1): 40-50.

763 **Mei, W., Lee, K. W., Marlow, F. L., Miller, A. L. and Mullins, M. C.** (2009) 'hnRNP I is required  
764 to generate the Ca<sup>2+</sup> signal that causes egg activation in zebrafish', *Development* 136(17):  
765 3007-17.

766 **Meyuhas, O.** (2015) 'Ribosomal Protein S6 Phosphorylation: Four Decades of Research', *Int*  
767 *Rev Cell Mol Biol* 320: 41-73.

768 **Miao, L., Yuan, Y., Cheng, F., Fang, J., Zhou, F., Ma, W., Jiang, Y., Huang, X., Wang, Y.,**  
769 **Shan, L. et al.** (2017) 'Translation repression by maternal RNA binding protein Zar1 is  
770 essential for early oogenesis in zebrafish', *Development* 144(1): 128-138.

771 **Mitsui, K., Tokuzawa, Y., Itoh, H., Segawa, K., Murakami, M., Takahashi, K., Maruyama, M.,**  
772 **Maeda, M. and Yamanaka, S.** (2003) 'The homeoprotein Nanog is required for maintenance  
773 of pluripotency in mouse epiblast and ES cells', *Cell* 113(5): 631-642.

774 **Nair, S., Lindeman, R. E. and Pelegri, F.** (2013) 'In vitro oocyte culture-based manipulation of  
775 zebrafish maternal genes', *Dev Dyn* 242(1): 44-52.

776 **Nakamura, A., Amikura, R., Hanyu, K. and Kobayashi, S.** (2001) 'Me31B silences

translation of oocyte-localizing RNAs through the formation of cytoplasmic RNP complex during *Drosophila* oogenesis', *Development* 128(17): 3233-42.

**Oyadomari, S. and Mori, M.** (2004) 'Roles of CHOP/GADD153 in endoplasmic reticulum stress', *Cell Death Differ* 11(4): 381-9.

**Palfy, M., Schulze, G., Valen, E. and Vastenhouw, N. L.** (2020) 'Chromatin accessibility established by Pou5f3, Sox19b and Nanog primes genes for activity during zebrafish genome activation', *PLoS Genet* 16(1): e1008546.

Perez-Camps, Mireia, Tian, Jing, Chng, Serene C., Sem, Kai Pin, Sudhaharan, Thankiah, Teh, Cathleen, Wachsmuth, Malte, Korzh, Vladimir, Ahmed, Sohail and Reversade, Bruno (2016) Quantitative imaging reveals real-time Pou5f3-Nanog complexes driving dorsoventral mesendoderm patterning in zebrafish *Elife*, vol. 5.

**Pique, M., Lopez, J. M., Foissac, S., Guigo, R. and Mendez, R.** (2008) 'A combinatorial code for CPE-mediated translational control', *Cell* 132(3): 434-48.

**Rao, R. V. and Bredesen, D. E.** (2004) 'Misfolded proteins, endoplasmic reticulum stress and neurodegeneration', *Curr Opin Cell Biol* 16(6): 653-62.

**Richter, J. D. and Lasko, P.** (2011) 'Translational control in oocyte development', *Cold Spring Harb Perspect Biol* 3(9): a002758.

**Sasikumar, Arjun N., Perez, Winder B. and Kinzy, Terri Goss** (2012) 'The many roles of the eukaryotic elongation factor 1 complex', *Wiley Interdisciplinary Reviews: RNA* 3(4): 543-555.

**Schagger, H.** (2006) 'Tricine-SDS-PAGE', *Nat Protoc* 1(1): 16-22.

**Schroder, M. and Kaufman, R. J.** (2005) 'ER stress and the unfolded protein response', *Mutat Res* 569(1-2): 29-63.

**Selman, K., Wallace, R. A., Sarka, A. and Qi, X.** (1993) 'Stages of oocyte development in the zebrafish, *Brachydanio rerio*', *J Morphol* 218(2): 203-224.

**Shen, X., Zhang, K. and Kaufman, R. J.** (2004) 'The unfolded protein response--a stress signaling pathway of the endoplasmic reticulum', *J Chem Neuroanat* 28(1-2): 79-92.

**Shen, Xiaohua, Ellis, Ronald E., Lee, Kyungho, Liu, Chuan-Yin, Yang, Kun, Solomon, Aaron, Yoshida, Hiderou, Morimoto, Rick, Kurnit, David M., Mori, Kazutoshi et al.** (2001) 'Complementary Signaling Pathways Regulate the Unfolded Protein Response and Are Required for *C. elegans* Development', *Cell* 107(7): 893-903.

807 **Silva, Jose, Nichols, Jennifer, Theunissen, Thorold W., Guo, Ge, van Oosten, Anouk L.,**  
808 **Barrandon, Ornella, Wray, Jason, Yamanaka, Shinya, Chambers, Ian and Smith, Austin**  
809 (2009) 'Nanog Is the Gateway to the Pluripotent Ground State', *Cell* 138(4): 722-737.

810 **Smibert, C. A., Lie, Y. S., Shillinglaw, W., Henzel, W. J. and Macdonald, P. M.** (1999)  
811 'Smaug, a novel and conserved protein, contributes to repression of nanos mRNA translation  
812 in vitro', *RNA* 5(12): 1535-47.

813 **Smibert, C. A., Wilson, J. E., Kerr, K. and Macdonald, P. M.** (1996) 'smaug protein  
814 represses translation of unlocalized nanos mRNA in the Drosophila embryo', *Genes Dev*  
815 10(20): 2600-9.

816 **Snee, M., Benz, D., Jen, J. and Macdonald, P. M.** (2008) 'Two distinct domains of Bruno bind  
817 specifically to the oskar mRNA', *RNA Biol* 5(1): 1-9.

818 **Sun, J., Yan, L., Shen, W. and Meng, A.** (2018) 'Maternal Ybx1 safeguards zebrafish oocyte  
819 maturation and maternal-to-zygotic transition by repressing global translation', *Development*  
820 145(19).

821 **Takahashi, Kazutoshi and Yamanaka, Shinya** (2006) 'Induction of Pluripotent Stem Cells  
822 from Mouse Embryonic and Adult Fibroblast Cultures by Defined Factors', *Cell* 126: 663-676.

823 **Thisse, C. and Thisse, B.** (2008) 'High-resolution in situ hybridization to whole-mount  
824 zebrafish embryos', *Nat Protoc* 3(1): 59-69.

825 **Trapnell, C., Williams, B. A., Pertea, G., Mortazavi, A., Kwan, G., van Baren, M. J.,**  
826 **Salzberg, S. L., Wold, B. J. and Pachter, L.** (2010) 'Transcript assembly and quantification by  
827 RNA-Seq reveals unannotated transcripts and isoform switching during cell differentiation',  
828 *Nat Biotechnol* 28(5): 511-5.

829 **Veil, M., Schaechtle, M. A., Gao, M. J., Kirner, V., Buryanova, L., Grethen, R. and**  
830 **Onichtchouk, D.** (2018) 'Maternal Nanog is required for zebrafish embryo architecture and for  
831 cell viability during gastrulation', *Development* 145(1).

832 **Veil, M., Yampolsky, L. Y., Gruning, B. and Onichtchouk, D.** (2019) 'Pou5f3, SoxB1, and  
833 Nanog remodel chromatin on high nucleosome affinity regions at zygotic genome activation',  
834 *Genome Res.*

835 **Wang, M., Ly, M., Lugowski, A., Laver, J. D., Lipshitz, H. D., Smibert, C. A. and Rissland,**  
836 **O. S.** (2017) 'ME31B globally represses maternal mRNAs by two distinct mechanisms during

the *Drosophila* maternal-to-zygotic transition', *Elife* 6.

**Wei, C. Y., Wang, H. P., Zhu, Z. Y. and Sun, Y. H.** (2014) 'Transcriptional factors smad1 and smad9 act redundantly to mediate zebrafish ventral specification downstream of smad5', *J Biol Chem* 289(10): 6604-6618.

Westerfield, Monte. (1995) *The zebrafish book : a guide for the laboratory use of zebrafish (Danio rerio)*, Eugene, OR: M. Westerfield.

**Winata, Cecilia Lanny, Łapiński, Maciej, Pryszcz, Leszek, Vaz, Candida, bin Ismail, Muhammad Hisyam, Nama, Srikanth, Hajan, Hajira Shreen, Lee, Serene Gek Ping, Korzh, Vladimir, Sampath, Prabha et al.** (2017) 'Cytoplasmic polyadenylation-mediated translational control of maternal mRNAs directs maternal to zygotic transition', *Development*.

**Xu, C., Fan, Z. P., Muller, P., Fogley, R., DiBiase, A., Trompouki, E., Unternaehrer, J., Xiong, F., Torregroza, I., Evans, T. et al.** (2012) 'Nanog-like regulates endoderm formation through the Mxtx2-Nodal pathway', *Developmental Cell* 22(3): 625-38.

**Yarunin, A., Harris, R. E., Ashe, M. P. and Ashe, H. L.** (2011) 'Patterning of the *Drosophila* oocyte by a sequential translation repression program involving the d4EHP and Belle translational repressors', *RNA Biol* 8(5): 904-12.

**Ye, D., Wang, X., Wei, C., He, M., Wang, H., Wang, Y., Zhu, Z. and Sun, Y.** (2019) 'Marcksb plays a key role in the secretory pathway of zebrafish Bmp2b', *PLoS Genet* 15(9): e1008306.

**Yoshida, Hiderou, Matsui, Toshie, Yamamoto, Akira, Okada, Tetsuya and Mori, Kazutoshi** (2001) 'XBP1 mRNA Is Induced by ATF6 and Spliced by IRE1 in Response to ER Stress to Produce a Highly Active Transcription Factor', *Cell* 107(7): 881-891.

**Zhang, F., Hao, Y., Li, X., Li, Y., Ye, D., Zhang, R., Wang, X., He, M., Wang, H., Zhu, Z. et al.** (2021) 'Surrogate production of genome-edited sperm from a different subfamily by spermatogonial stem cell transplantation', *Sci China Life Sci*.

**Zhang, Q., Ye, D., Wang, H., Wang, Y. and Sun, Y.** (2020) 'Zebrafish cyp11c1 knockout reveals the roles of 11-ketotestosterone and cortisol in sexual development and reproduction', *Endocrinology*.



## 867 **Figure legend**

868 **Fig. 1. Loss of maternal *nanog* resulted in oocyte maturation defects.** (A)  
869 Bright-field images showing the embryonic malformation of *Mnanog* mutants in  
870 contrast to time-matched WT embryos. Scale bar, 100µm. (B) WT and *Mnanog*  
871 embryos with chorions at 15 min post-fertilization (mpf). Scale bar, 100µm. (C,  
872 D) Measurement of chorion diameter and oocyte diameter at 15 mpf.  
873 \*\*\* $P < 0.001$ . N=20. (E) Representative images showing labelling of cortical  
874 granules (CG) in WT and *nanog* mutant eggs fixed at 10 mpa. F-actin was  
875 stained using phalloidin to show the outline of embryo. Scale bar, 100µm.  
876 N=25. (F) Appearance of ovaries dissected from WT and *nanog*<sup>-/-</sup> females.  
877 Scale bar, 1mm. (G) The GSI scatterplot of WT and *nanog*<sup>-/-</sup> females. N=8. GSI,  
878 gonadosomatic index. \* $P < 0.05$ . (H) Morphology of stage IV oocytes dissected  
879 from WT and *nanog*<sup>-/-</sup> ovaries with incubation of  
880 17α,20β-dihydroxy-4-pregnen-3-one (DHP, 1µg/mL) after 2 h. Scale bar, 1mm.  
881 (I) Comparison of the %GVBD in WT and *nanog* mutant oocytes. 6 WT and 10  
882 *nanog*<sup>-/-</sup> fishes were analyzed. (J) Stage V oocytes from WT and *nanog*  
883 mutant. Insets show enlarged regions of the yolk and relative opaqueness is  
884 seen in *nanog* mutants. Scale bar, 100µm. (K) SDS-PAGE and Coomassie  
885 staining of major yolk proteins of stage III oocytes and stage V oocytes. The  
886 higher and lower molecular weight yolk proteins (HYP and LYP) are indicated  
887 by the red arrowhead. HYP/LYP ratios were calculated to represent yolk  
888 protein cleavage levels.



889

890 **Fig. 2. Loss of *nanog* triggers ER stress/unfolded protein response (UPR)**

891 **and elevates global translation activity.** (A) Fluorescent images showing

892 mCherry reporter levels with GFP protein control levels in WT and *Mnanog*

893 embryos at 4hpf. Scale bar, 100µm. (B) Measurement of mCherry reporter

894 intensities relative to GFP. \*\* $P < 0.01$ .  $n = 14$ . (C, D) Western blotting analysis of

895 mCherry reporter levels at 4 hpf. \* $P < 0.05$ ; Student's t-test. (E) Western blot

896 analysis showed increased expression of Hspa5 (Bip) and Ddit3 (CHOP) in

897 *nanog*<sup>-/-</sup> ovary. (F-I) RT-qPCR analysis of *hsp5a* (F), *ddit3* (G), *atf6* (H) and

898 *ire1a* (I) in WT and *nanog*<sup>-/-</sup> ovaries. \*\* $P < 0.01$ , \*\*\* $P < 0.001$ . (J) Western blot

899 analysis of S6 and phosphorylated S6 in WT and *nanog*<sup>-/-</sup> ovary. (K) statistical

900 analysis of phosphorylated S6/S6 level in panel J. (L) Morphology of stage IV

901 oocytes dissected from *nanog*<sup>-/-</sup> ovaries and treated with PERK inhibitor after

902 2h. Oocytes dissected from 3 fishes were treated for 2 hours in the presence of

903 DHP. Final concentration: GSK2606414, 50 nM; ISRIB, 5 µM; DHP: 1µg/mL.

904 Scale bar, 1mm. (M) %GVBD comparison in *nanog* mutant oocytes treated

905 with or without PERK inhibitor.  $n = 3$ . \*\* $P < 0.01$ , \*\*\* $P < 0.001$ .

906

907 **Fig. 3. Nanog transcriptionally inhibits the expression of *eef1a1l2*.** (A)

908 RNA-seq analysis showed significantly increased expression of *eef1a1l2* in

909 *nanog* null egg. Red dots indicate upregulated genes, green dots indicate

910 down-regulated genes, and blue dots indicate no difference genes in *nanog*

911 mutant egg. (B) Upregulated expression of *eef1a1l2* in *nanog* mutant oocytes  
912 at different stages revealed by RT-qPCR.  $**P<0.01$ ,  $***P<0.001$ . (C) In situ  
913 hybridization on cryosections of ovaries and WISH analysis of unfertilized eggs  
914 revealed increased expression of *eef1a1l2* in *nanog* mutant. Scale bar, 200 $\mu$ m.  
915 (D,E) WISH (D) and RT-qPCR (E) analysis showed reduced expression of  
916 *eef1a1l2* in *nanog* or En-*nanog* overexpressed embryos at 6 hpf.  $**P<0.01$ .  
917 Scale bar, 100 $\mu$ m. (F) ChIP analysis of *Tg(CMV:nanog-myc)* ovaries with  
918 anti-Myc antibody at 6mpf. The promoter region of *eef1a1l2* was enriched in  
919 precipitated chromatin. *rp15b* was served as a negative control.

920

921 **Fig. 4. Depletion of *eef1a1l2* rescues the impaired oocyte maturation of**  
922 ***nanog* mutant.** (A) WT, *Mnanog* and *Mnanog*, *Meef1a1l2* embryos with  
923 chorions at 15 min post-fertilization (mpf). Scale bar, 100 $\mu$ m. (B,C)  
924 Measurement of chorion diameters and oocyte diameters at 15 mpf.  $*P<0.05$ ,  
925  $**P<0.01$ ,  $***P<0.001$ . n=20. (D) Representative images showing labelling of  
926 cortical granules (CG) in WT, *nanog*, and *nanog-eef1a1l2* double mutant eggs  
927 fixed at 10 mpa. F-actin was stained using phalloidin to show the outline of  
928 embryo. n=15. Scale bar, 100 $\mu$ m. (E) Appearance of ovaries dissected from  
929 WT, *nanog*<sup>-/-</sup> and *nanog*<sup>-/-</sup>,*eef1a1l2*<sup>-/-</sup> females. Scale bar, 1mm. (F) The GSI  
930 scatterplot of WT, *nanog*<sup>-/-</sup> and *nanog*<sup>-/-</sup>,*eef1a1l2*<sup>-/-</sup> females. n=3. GSI,  
931 gonadosomatic index.  $**P<0.01$ ,  $***P<0.001$ . (G) Morphology of eggs from WT,  
932 *nanog*<sup>-/-</sup> and *nanog*<sup>-/-</sup>,*eef1a1l2*<sup>-/-</sup>. Insets show enlarged regions of the yolk.

933 Scale bar, 100µm. (H) SDS-PAGE and Coomassie staining of major yolk  
934 proteins of stage III oocytes and stage V eggs. The higher and lower molecular  
935 weight yolk proteins (HYP and LYP) are indicated by the arrow. HYP/LYP  
936 ratios were calculated to represent yolk protein cleavage levels. (I) Morphology  
937 of stage IV oocytes dissected from WT, *nanog*<sup>-/-</sup> and *nanog*<sup>-/-</sup>,*eef1a1l2*<sup>-/-</sup> ovaries  
938 with incubation of DHP (1µg/mL) after 2h. Scale bar, 1mm. (J) Comparison of  
939 the %GVBD in WT, *nanog*<sup>-/-</sup> and *nanog*<sup>-/-</sup>,*eef1a1l2*<sup>-/-</sup> oocytes. WT n=11, *nanog*<sup>-/-</sup>  
940 n=9, *nanog*<sup>-/-</sup>,*eef1a1l2*<sup>-/-</sup> n=7.

941

942 **Fig. 5. Depletion of *eef1a1l2* ameliorates ER stress and UPR of *nanog***  
943 **mutant oocyte.** (A-D) RT-qPCR analysis showed expression reduction of  
944 *hspa5* (A), *ddit3* (B), *atf6* (C) and *ire1a* (D) in *nanog* and *eef1a1l2* double  
945 mutant ovary, compared with *nanog* mutant ovary. \**P*<0.05, \*\**P*<0.01,  
946 \*\*\**P*<0.001. (E, F) RT-PCR examination of *xbp1* splicing. The ratio of spliced  
947 *xbp1* (*xbp1s*) mRNA to unspliced *xbp1* (*xbp1u*) mRNA was increased in *nanog*  
948 mutant ovary, but restored in *nanog* and *eef1a1l2* double mutant. *gapdh* is  
949 used as internal control. The *xbp1s*/*xbp1u* ratio in F represents the intensity  
950 ratio of corresponding PCR product bands in E. (G) Observation of ER, Golgi  
951 and mitochondria structure in WT, *nanog* mutant and double mutant at stage I  
952 oocytes by transmission electron microscopy. White arrowheads indicate Golgi  
953 apparatus, yellow arrowheads indicate mitochondria, red arrowheads indicate  
954 lysosome. Scale bar, 0.5 µm.

955

956 **Fig. 6. Maternal depletion of *eef1a1l2* rescues early embryonic defects of**

957 ***nanog* mutant.** (A) Phenotype of WT, *Mnanog*, *Mnanog,Meef1a1l2*,

958 *Mnanog,MZeef1a1l2* and *Mnanog,Zeef1a1l2*, embryos at 0.2, 8, 12, and 24

959 hpf. Scale bar, 100  $\mu$ m. (B) Detection of *mxtx2*, *mir-430* precursor, *blf* and *sod1*

960 in WT, *Mnanog* and *Mnanog,Meef1a1l2* embryos by WISH at indicated stage.

961 scale bar, 100  $\mu$ m. (C) The model of Nanog function in oocyte and early

962 embryo of zebrafish. Top: Nanog acts as a transcriptional repressor to

963 suppress the expression of *eef1a1l2* and maintain the correct translation level

964 of maternal mRNAs during oocyte development. Then Nanog switches to a

965 transcriptional activator to prime zygotic genome activation in zygotes. Bottom:

966 in WT oocyte, Nanog inhibits the transcription of *eef1a1l2* and maintain the

967 proper level of global translation, ensuring appropriate amounts of proteins.

968 Good egg quality and normal embryonic development is thus guaranteed. In

969 the absence of maternal *nanog* (*nanog*<sup>-/-</sup>), the balance of global translation is

970 destroyed. Elevated translation resulted in excessive protein loading, further

971 leads to poor egg quality and failure embryogenesis. In *nanog* and *eef1a1l2*

972 double mutant oocyte (*nanog*<sup>-/-</sup>, *eef1a1l2*<sup>-/-</sup>), global translation level is mitigated

973 due to the absent of eEF1A1l2, protein overloading is relieved and egg quality

974 is also improved, thereby promotes a better embryonic morphology formation.

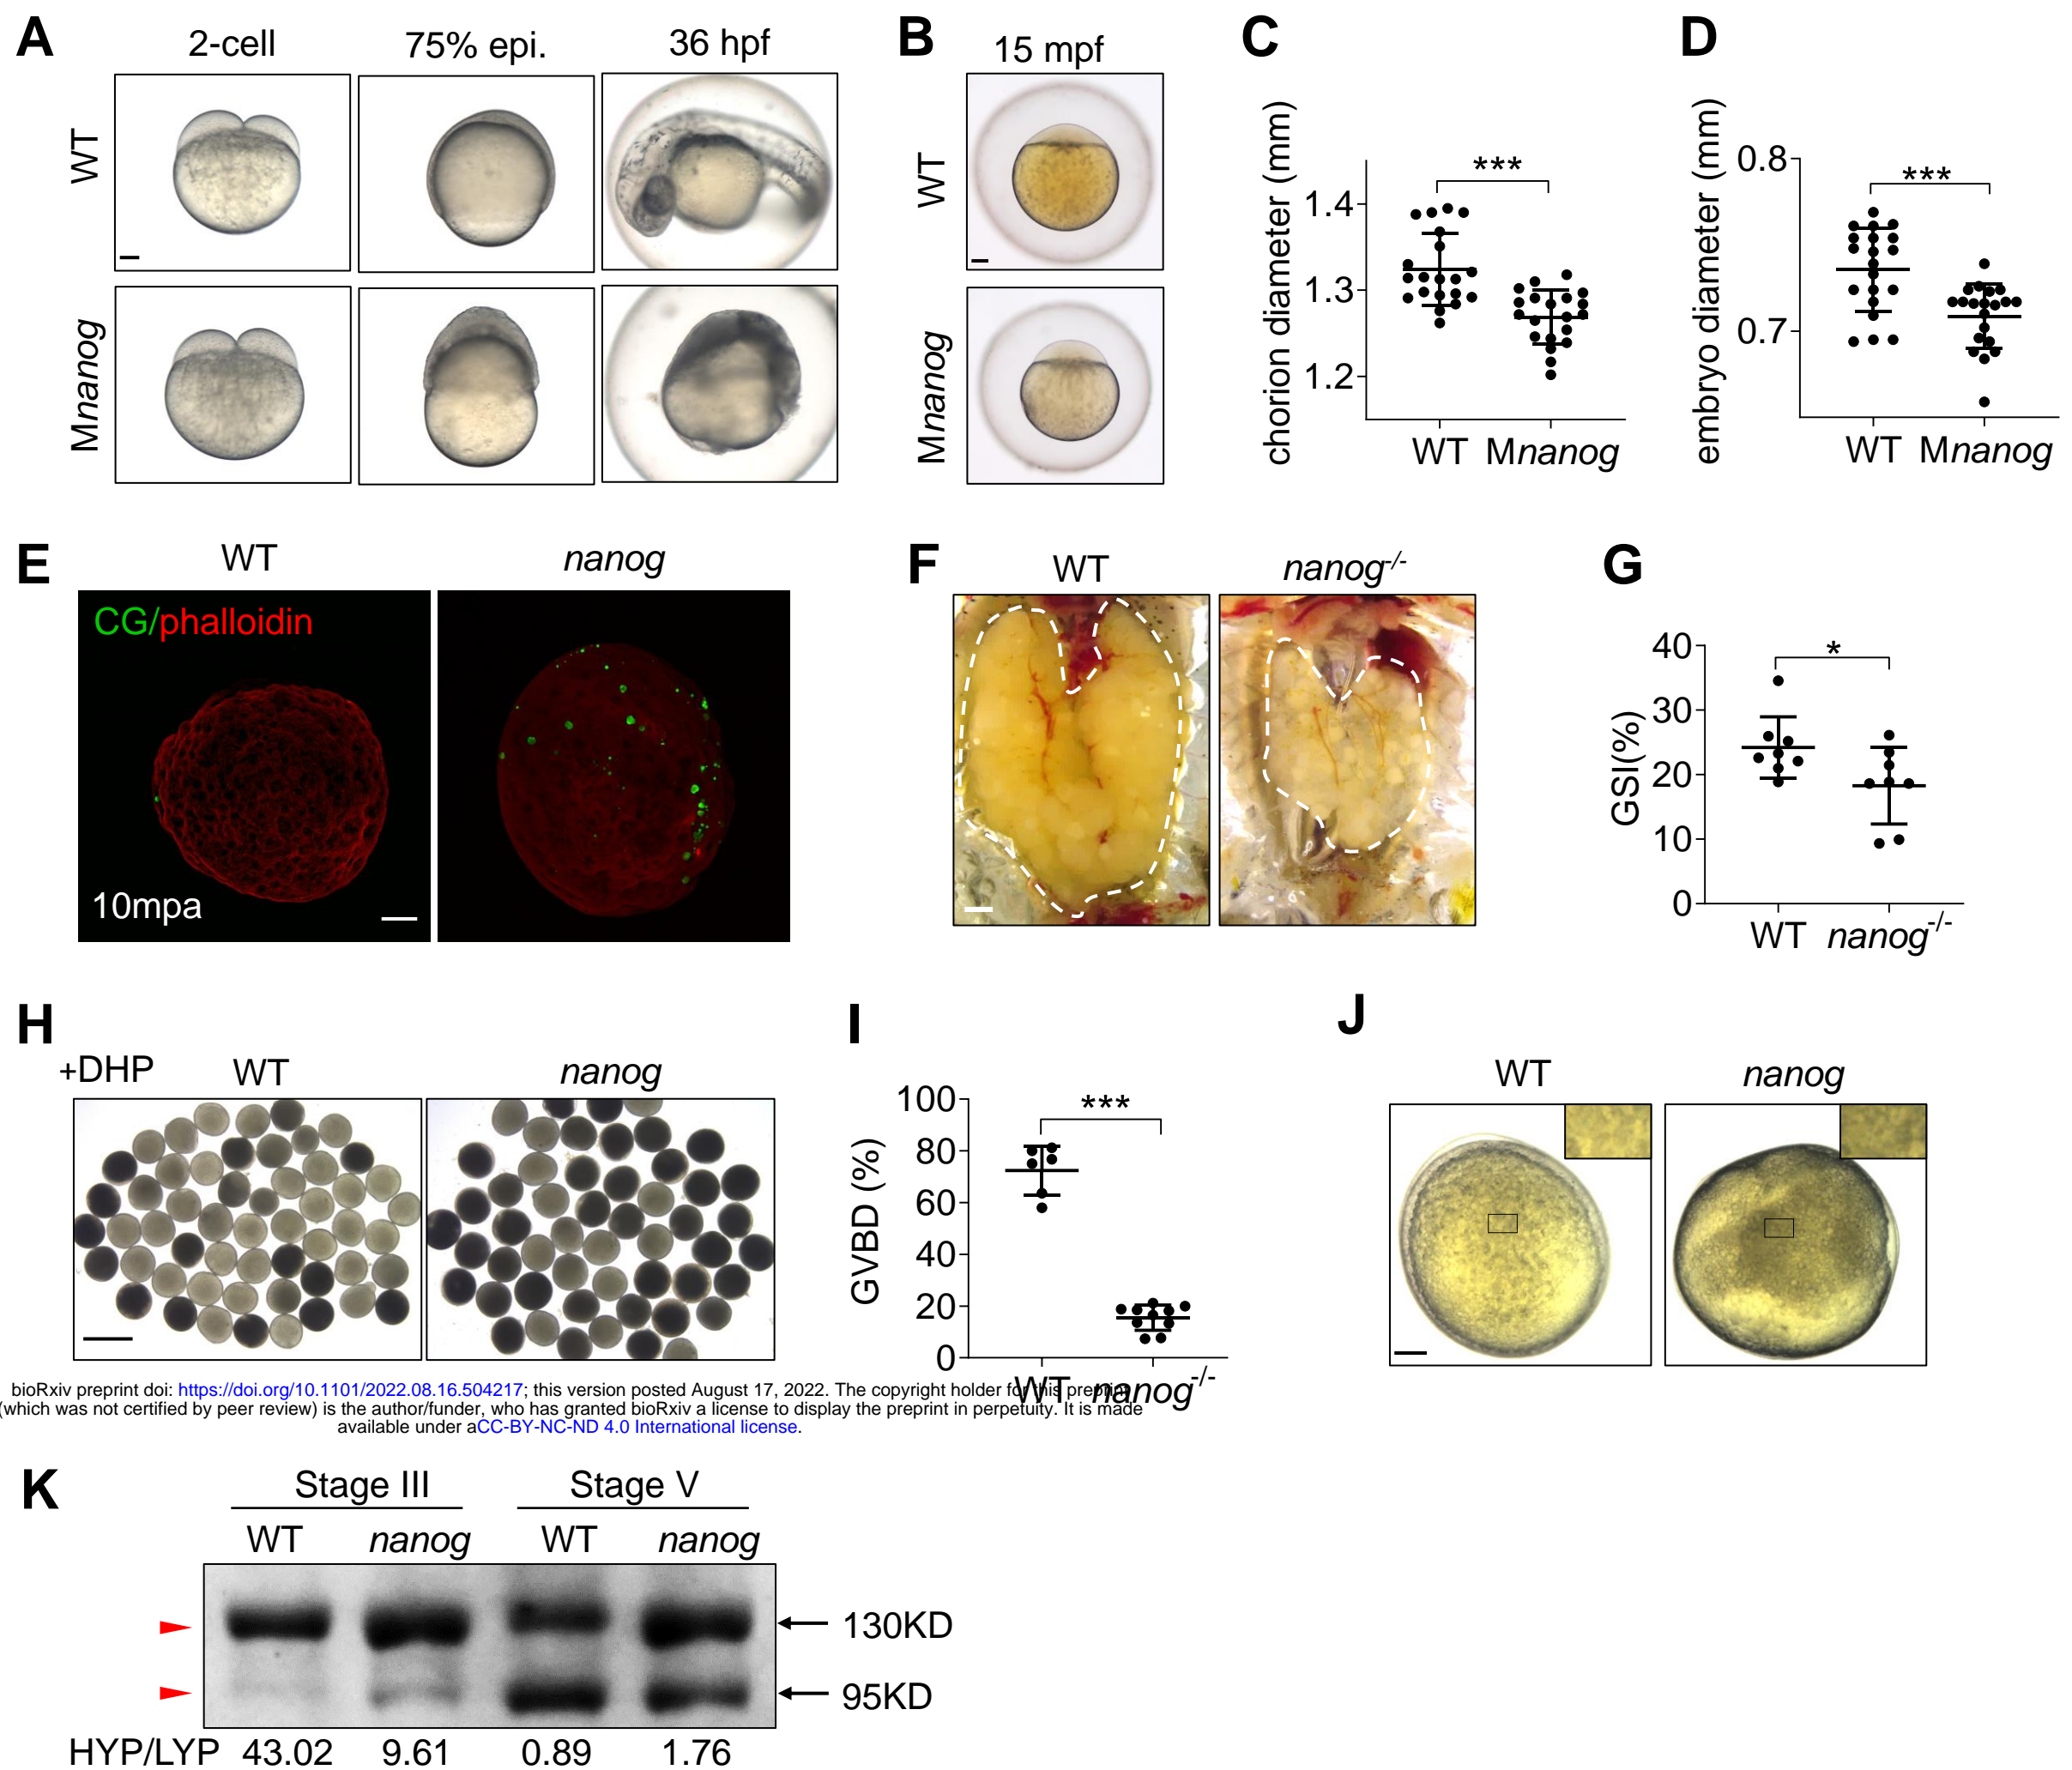

He et al., Fig. 1



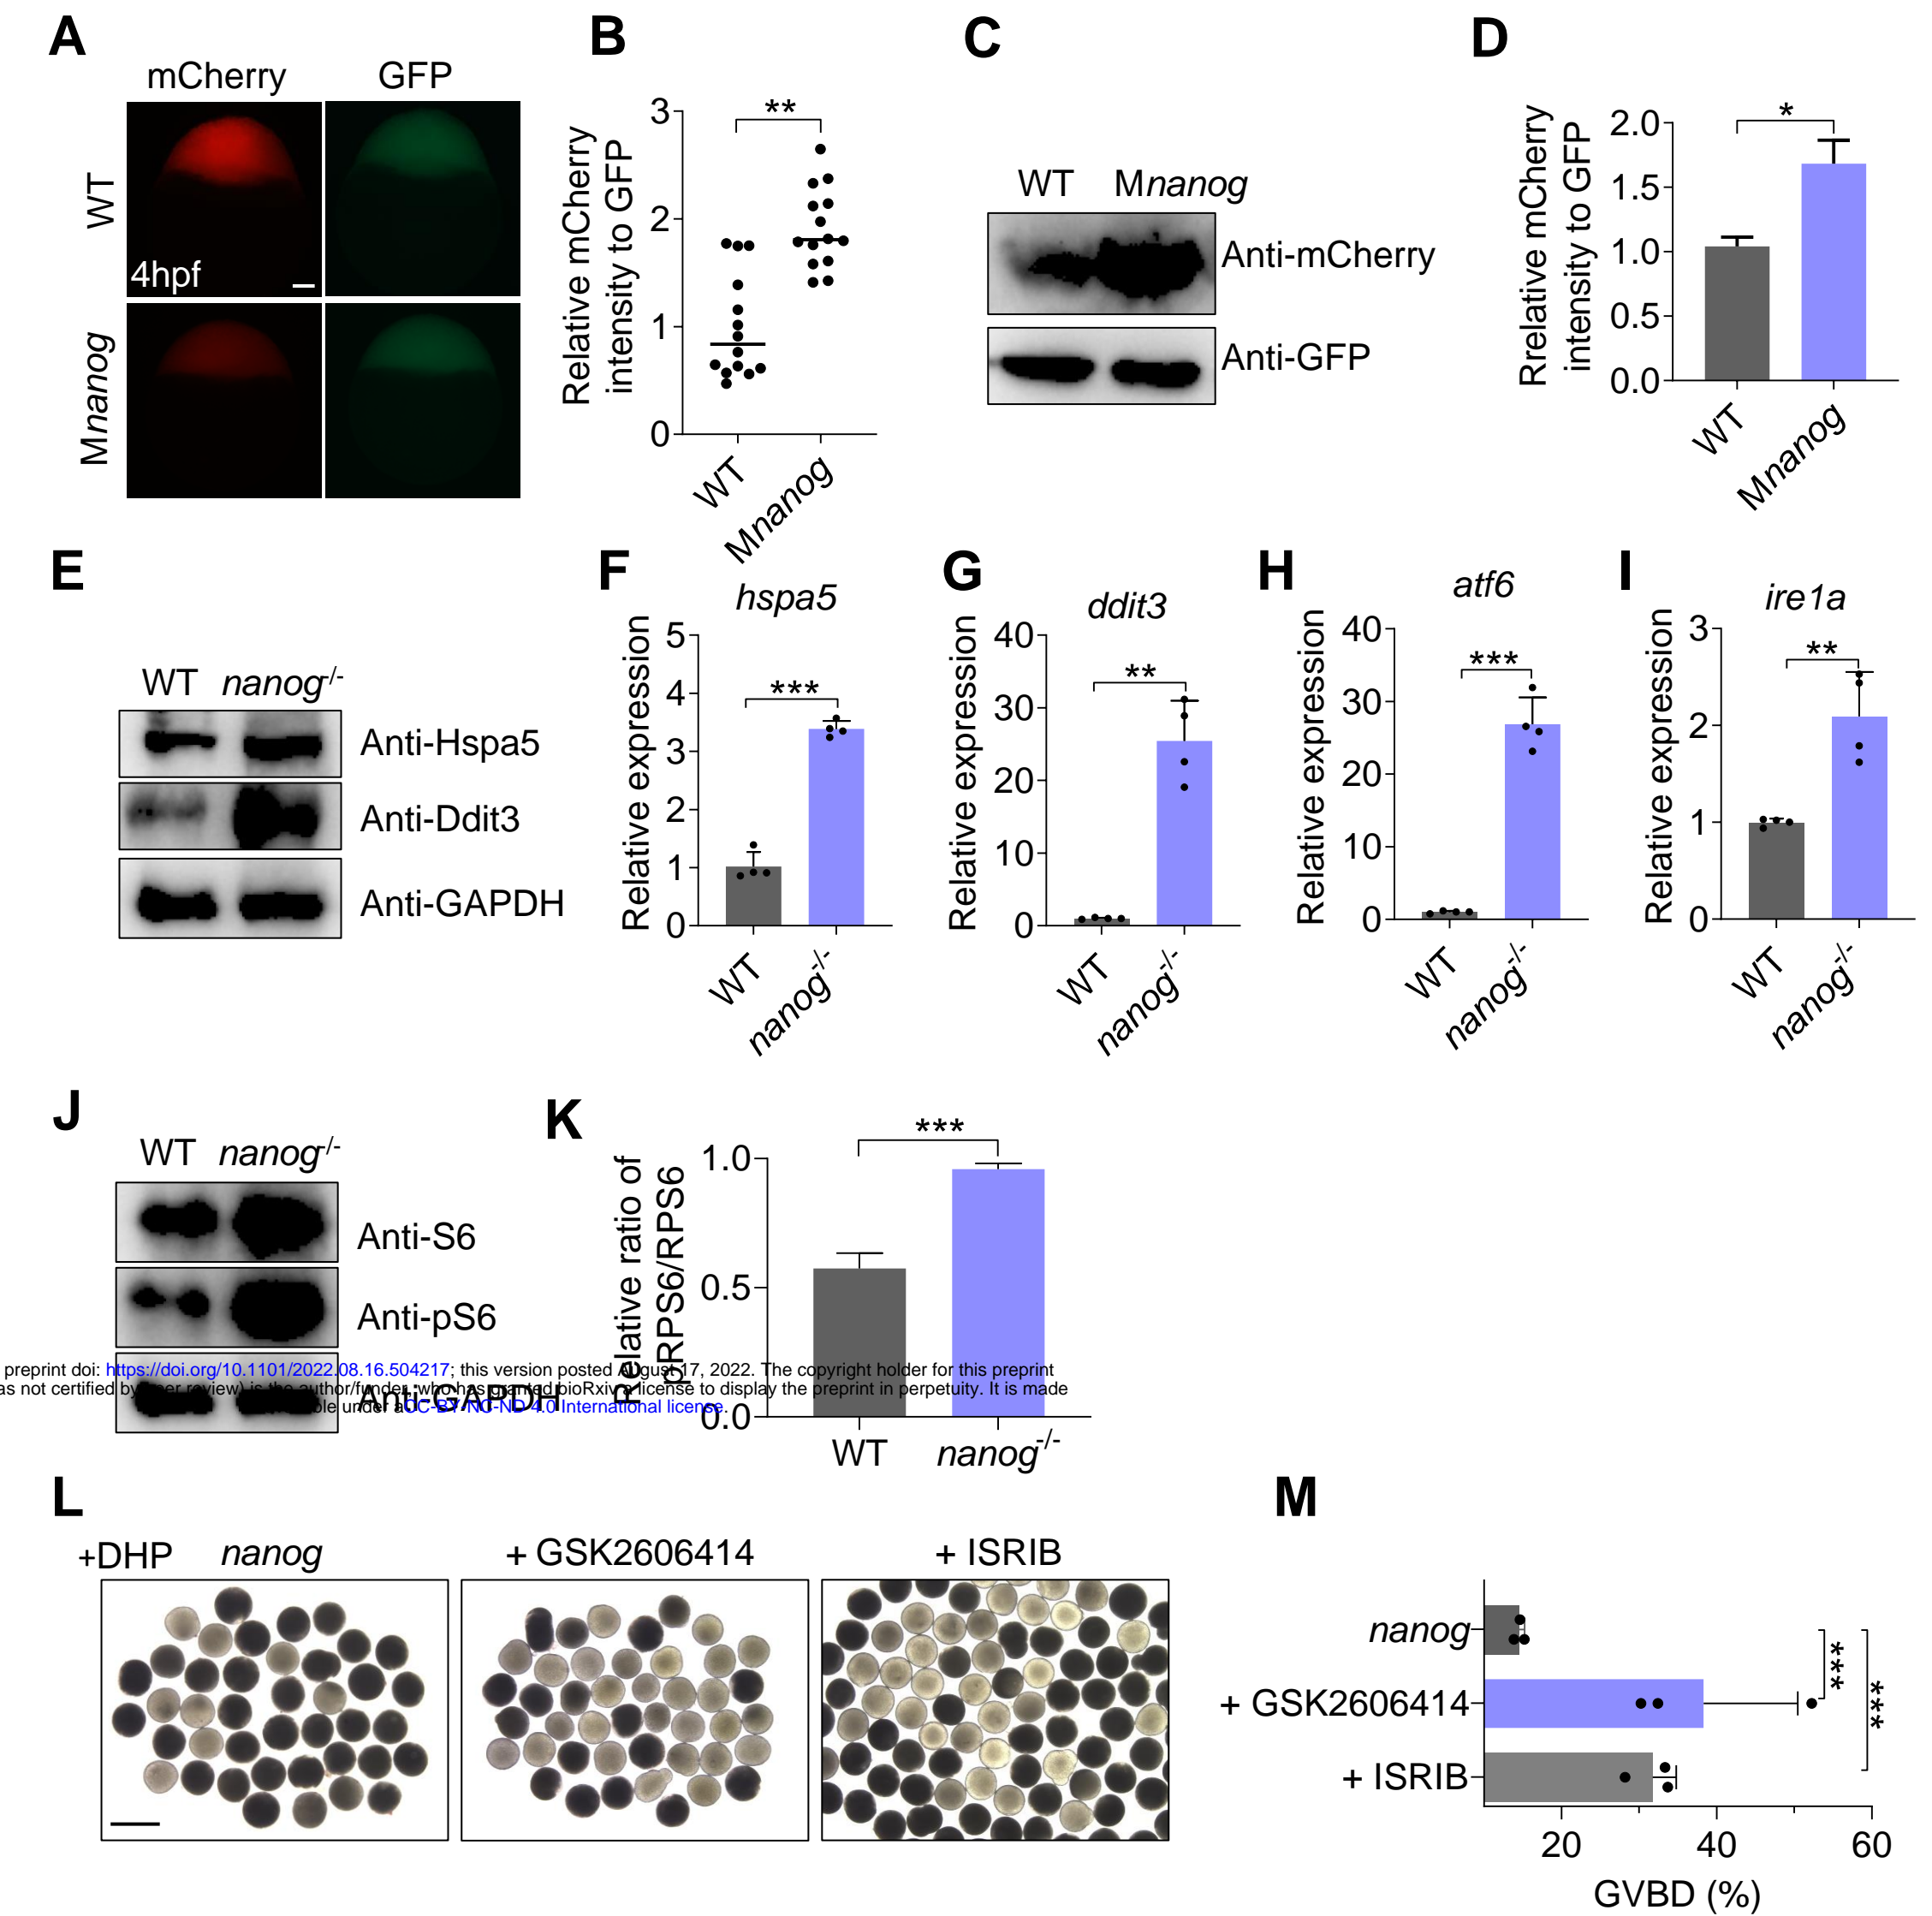

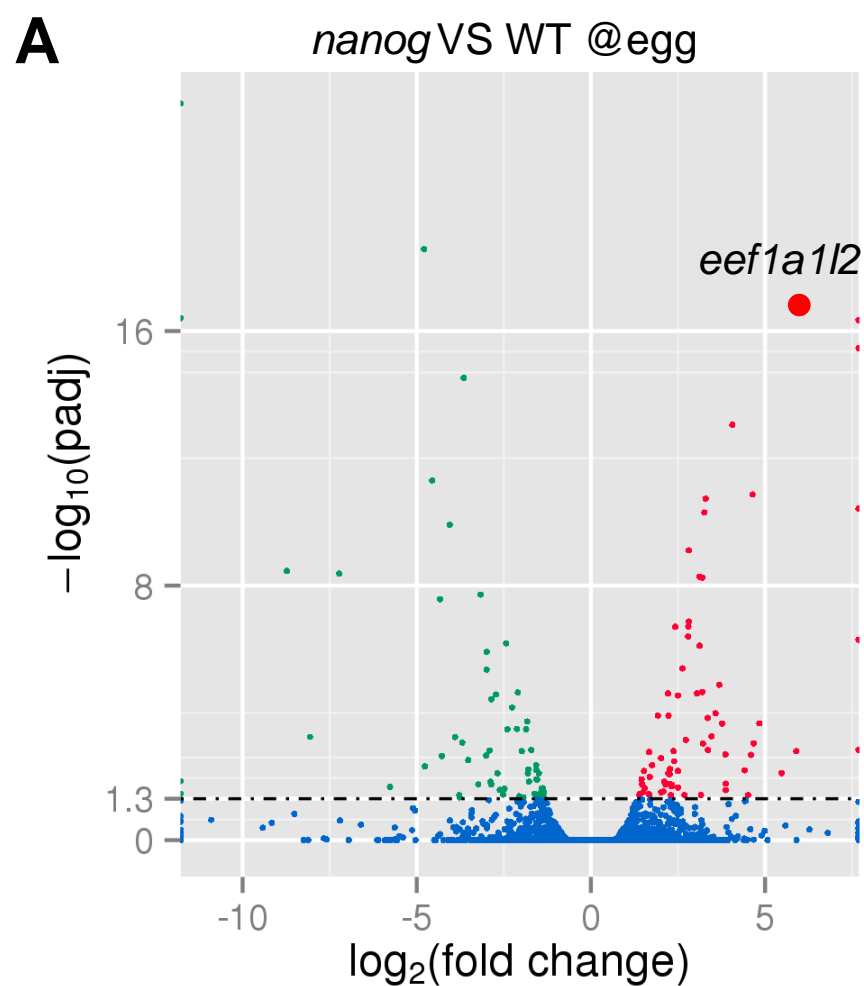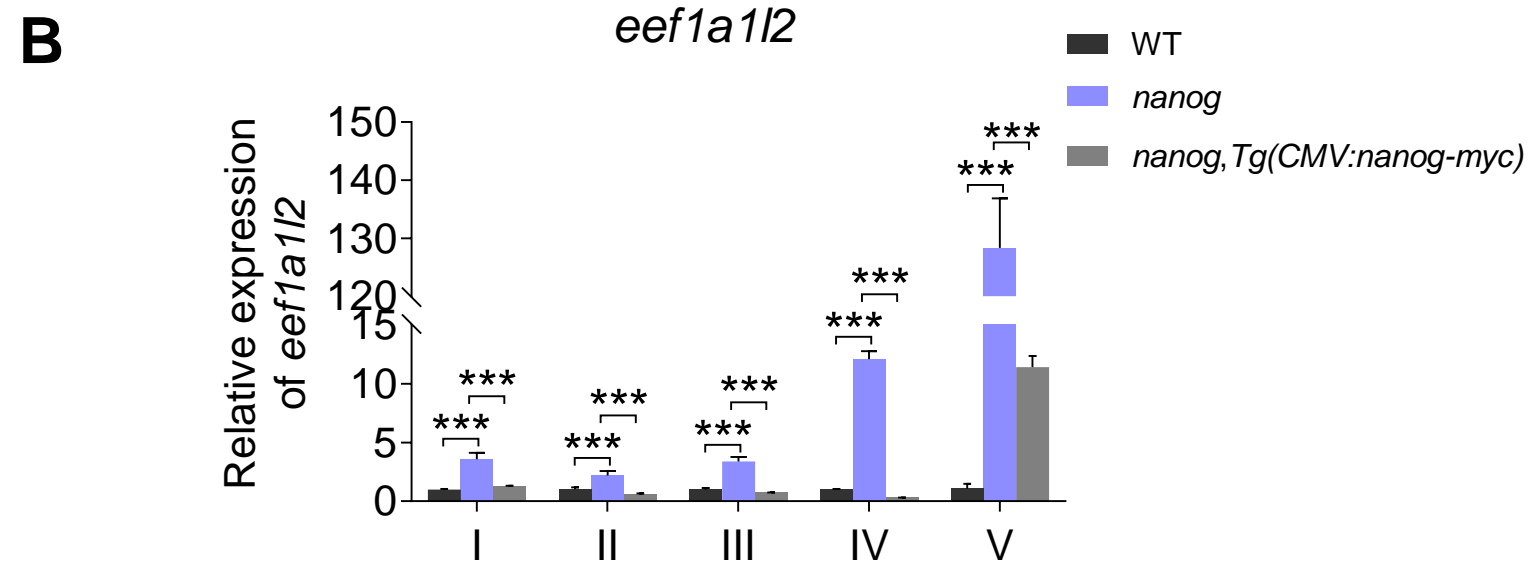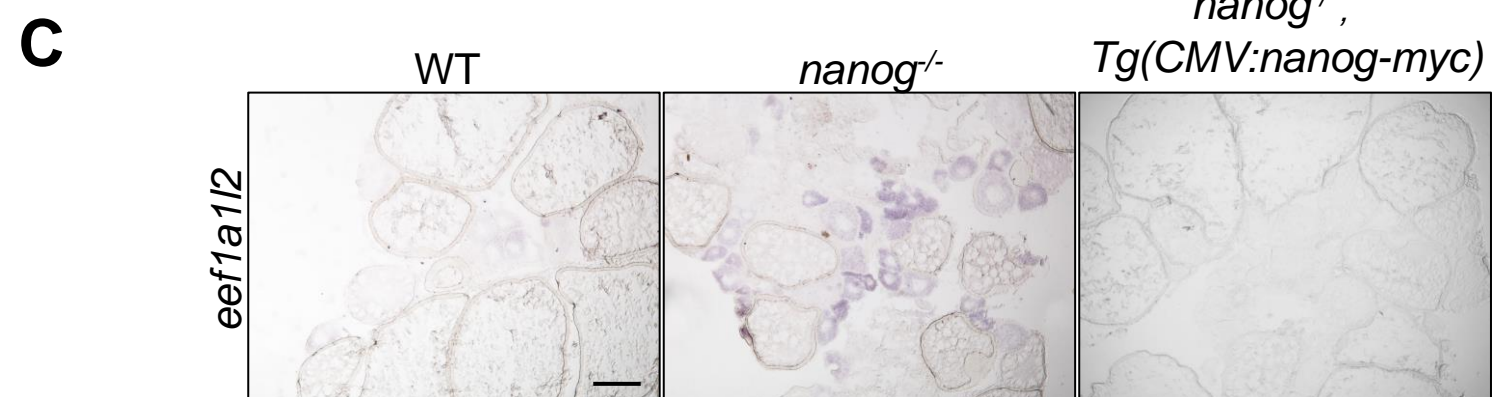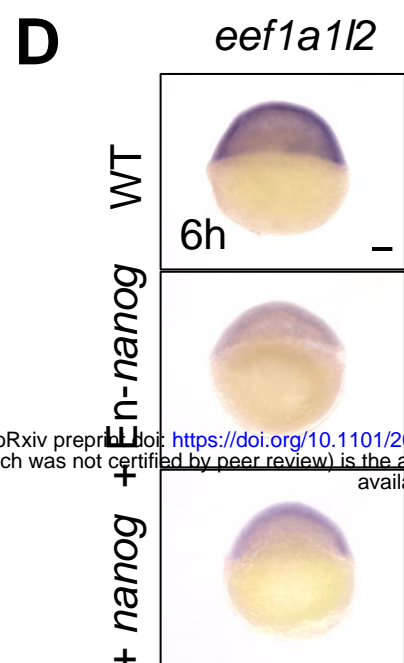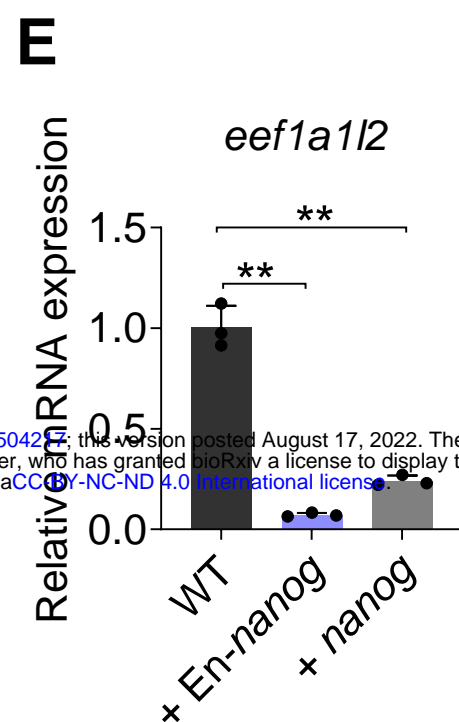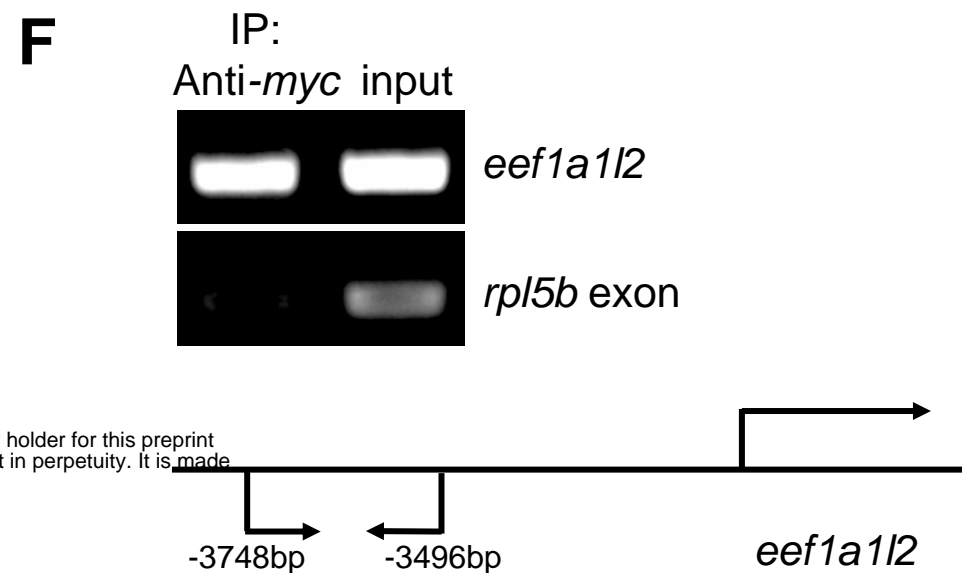



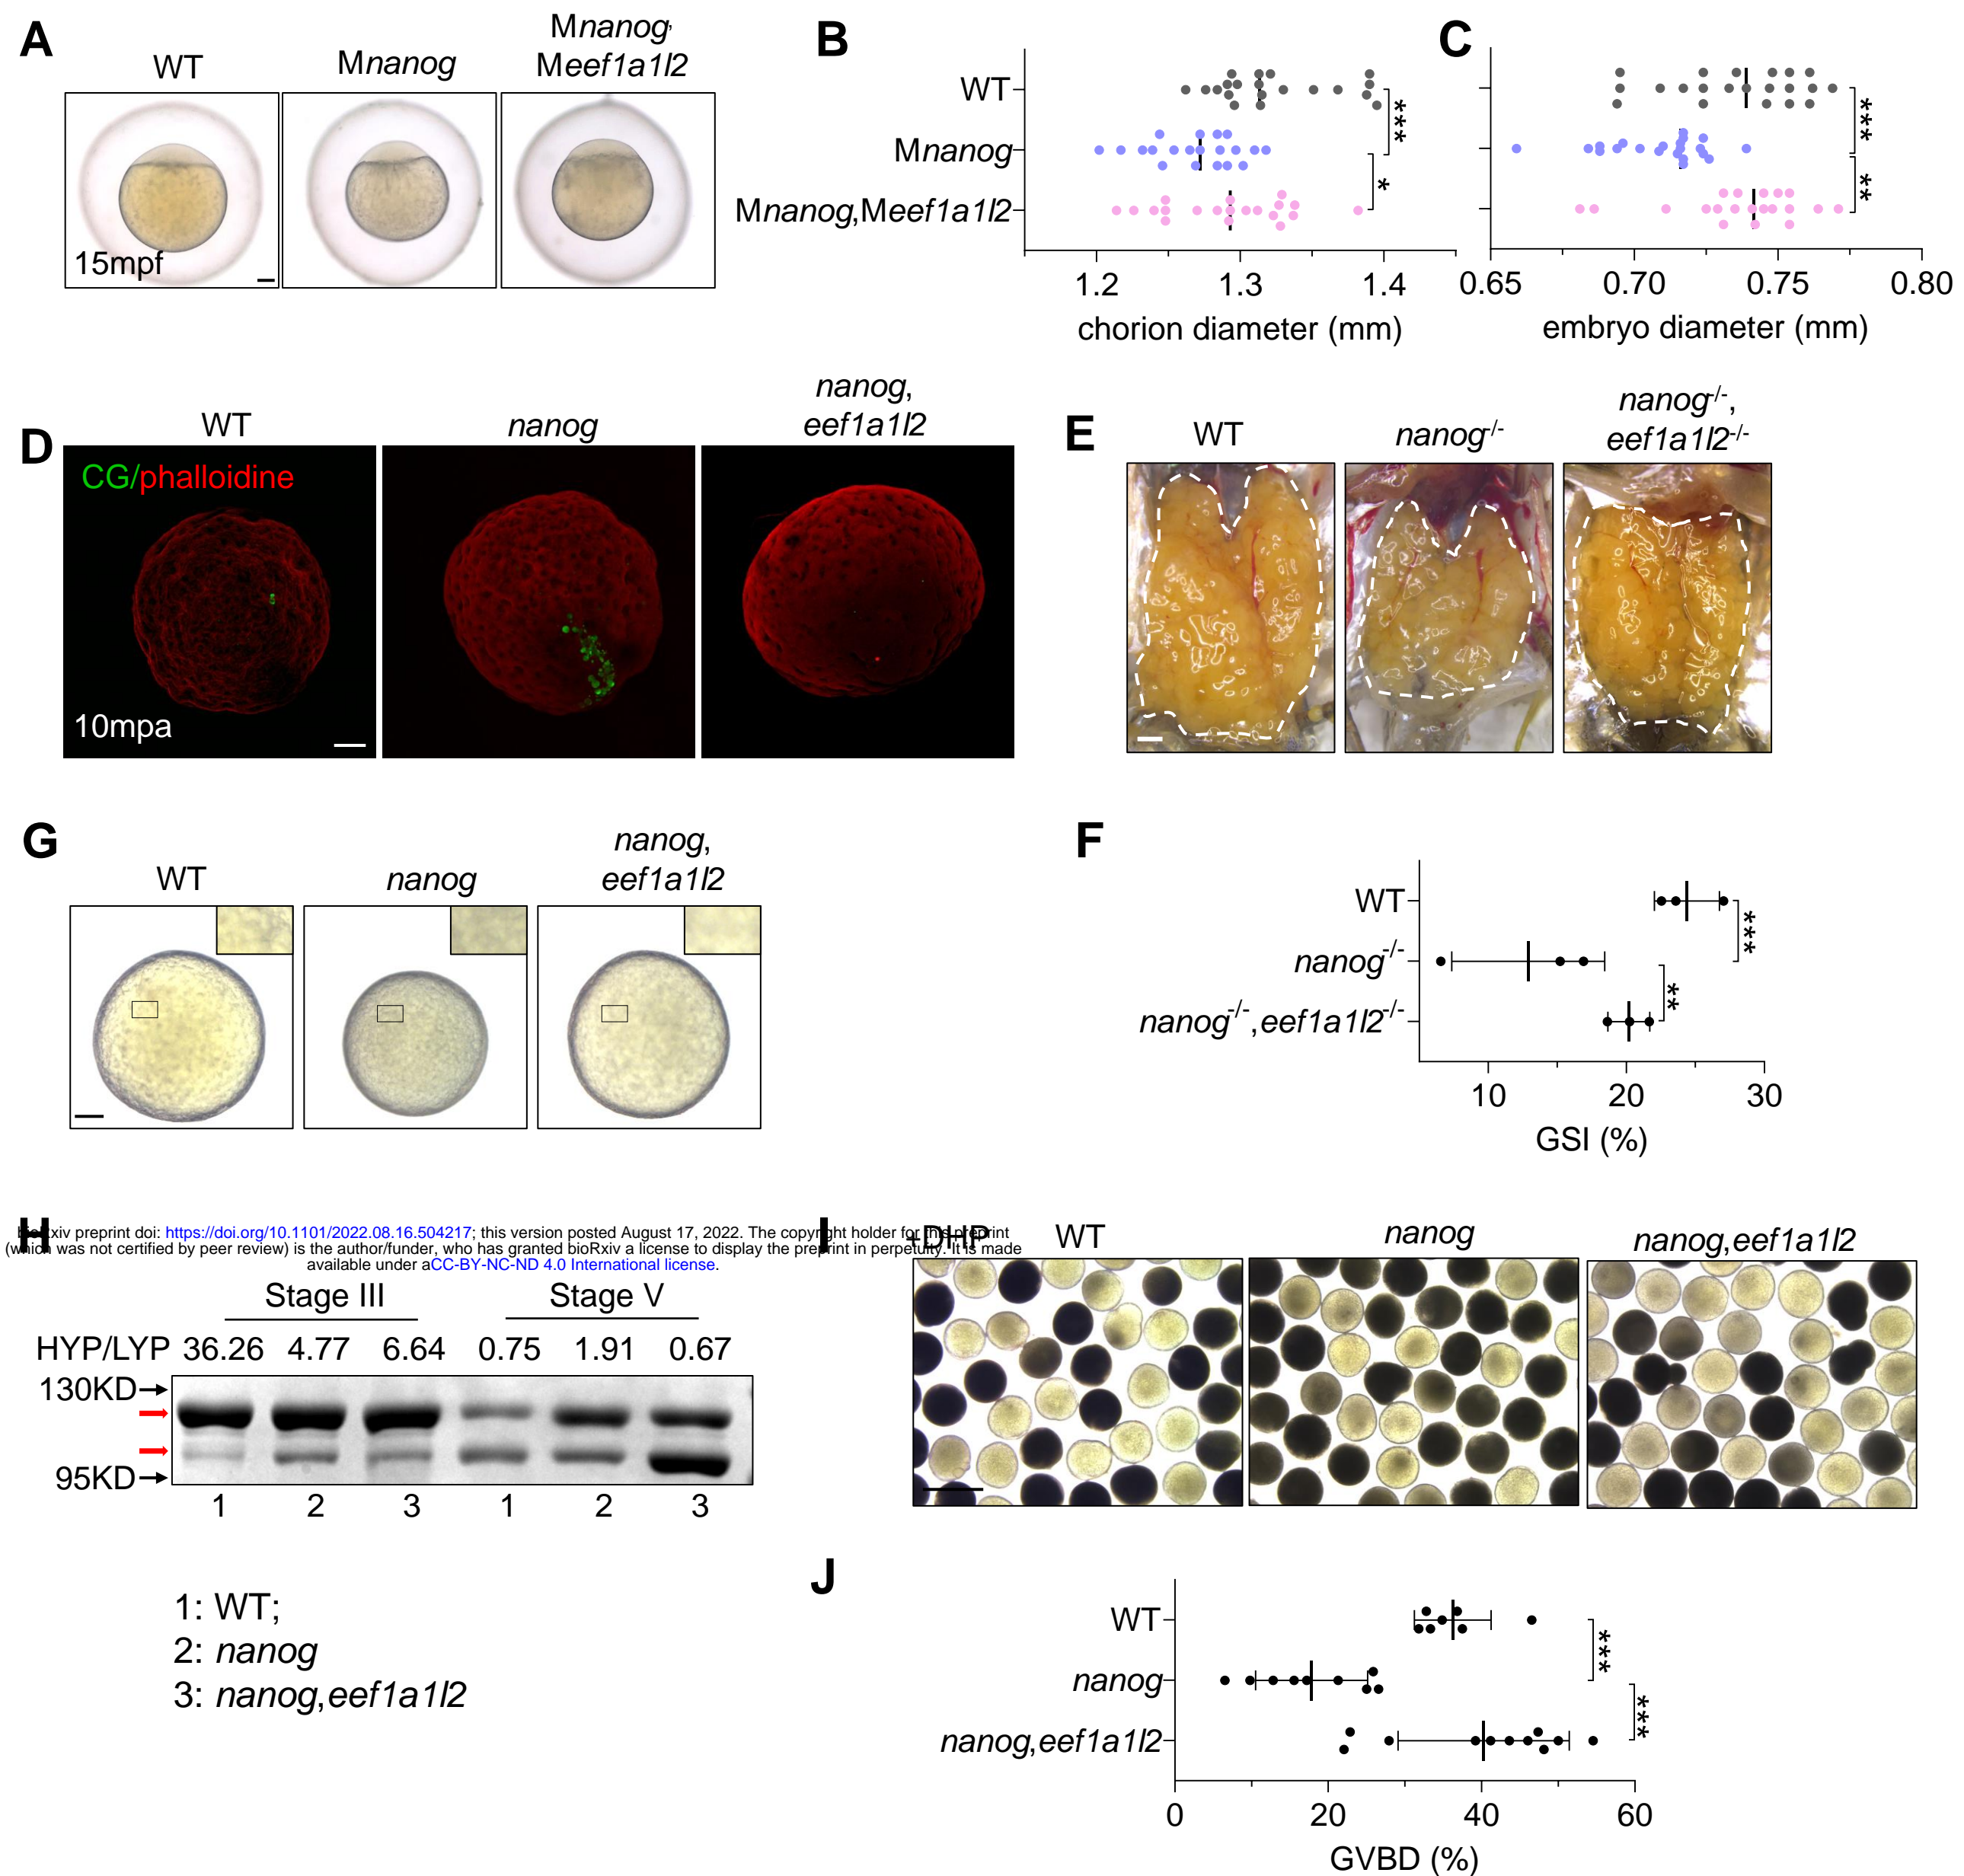



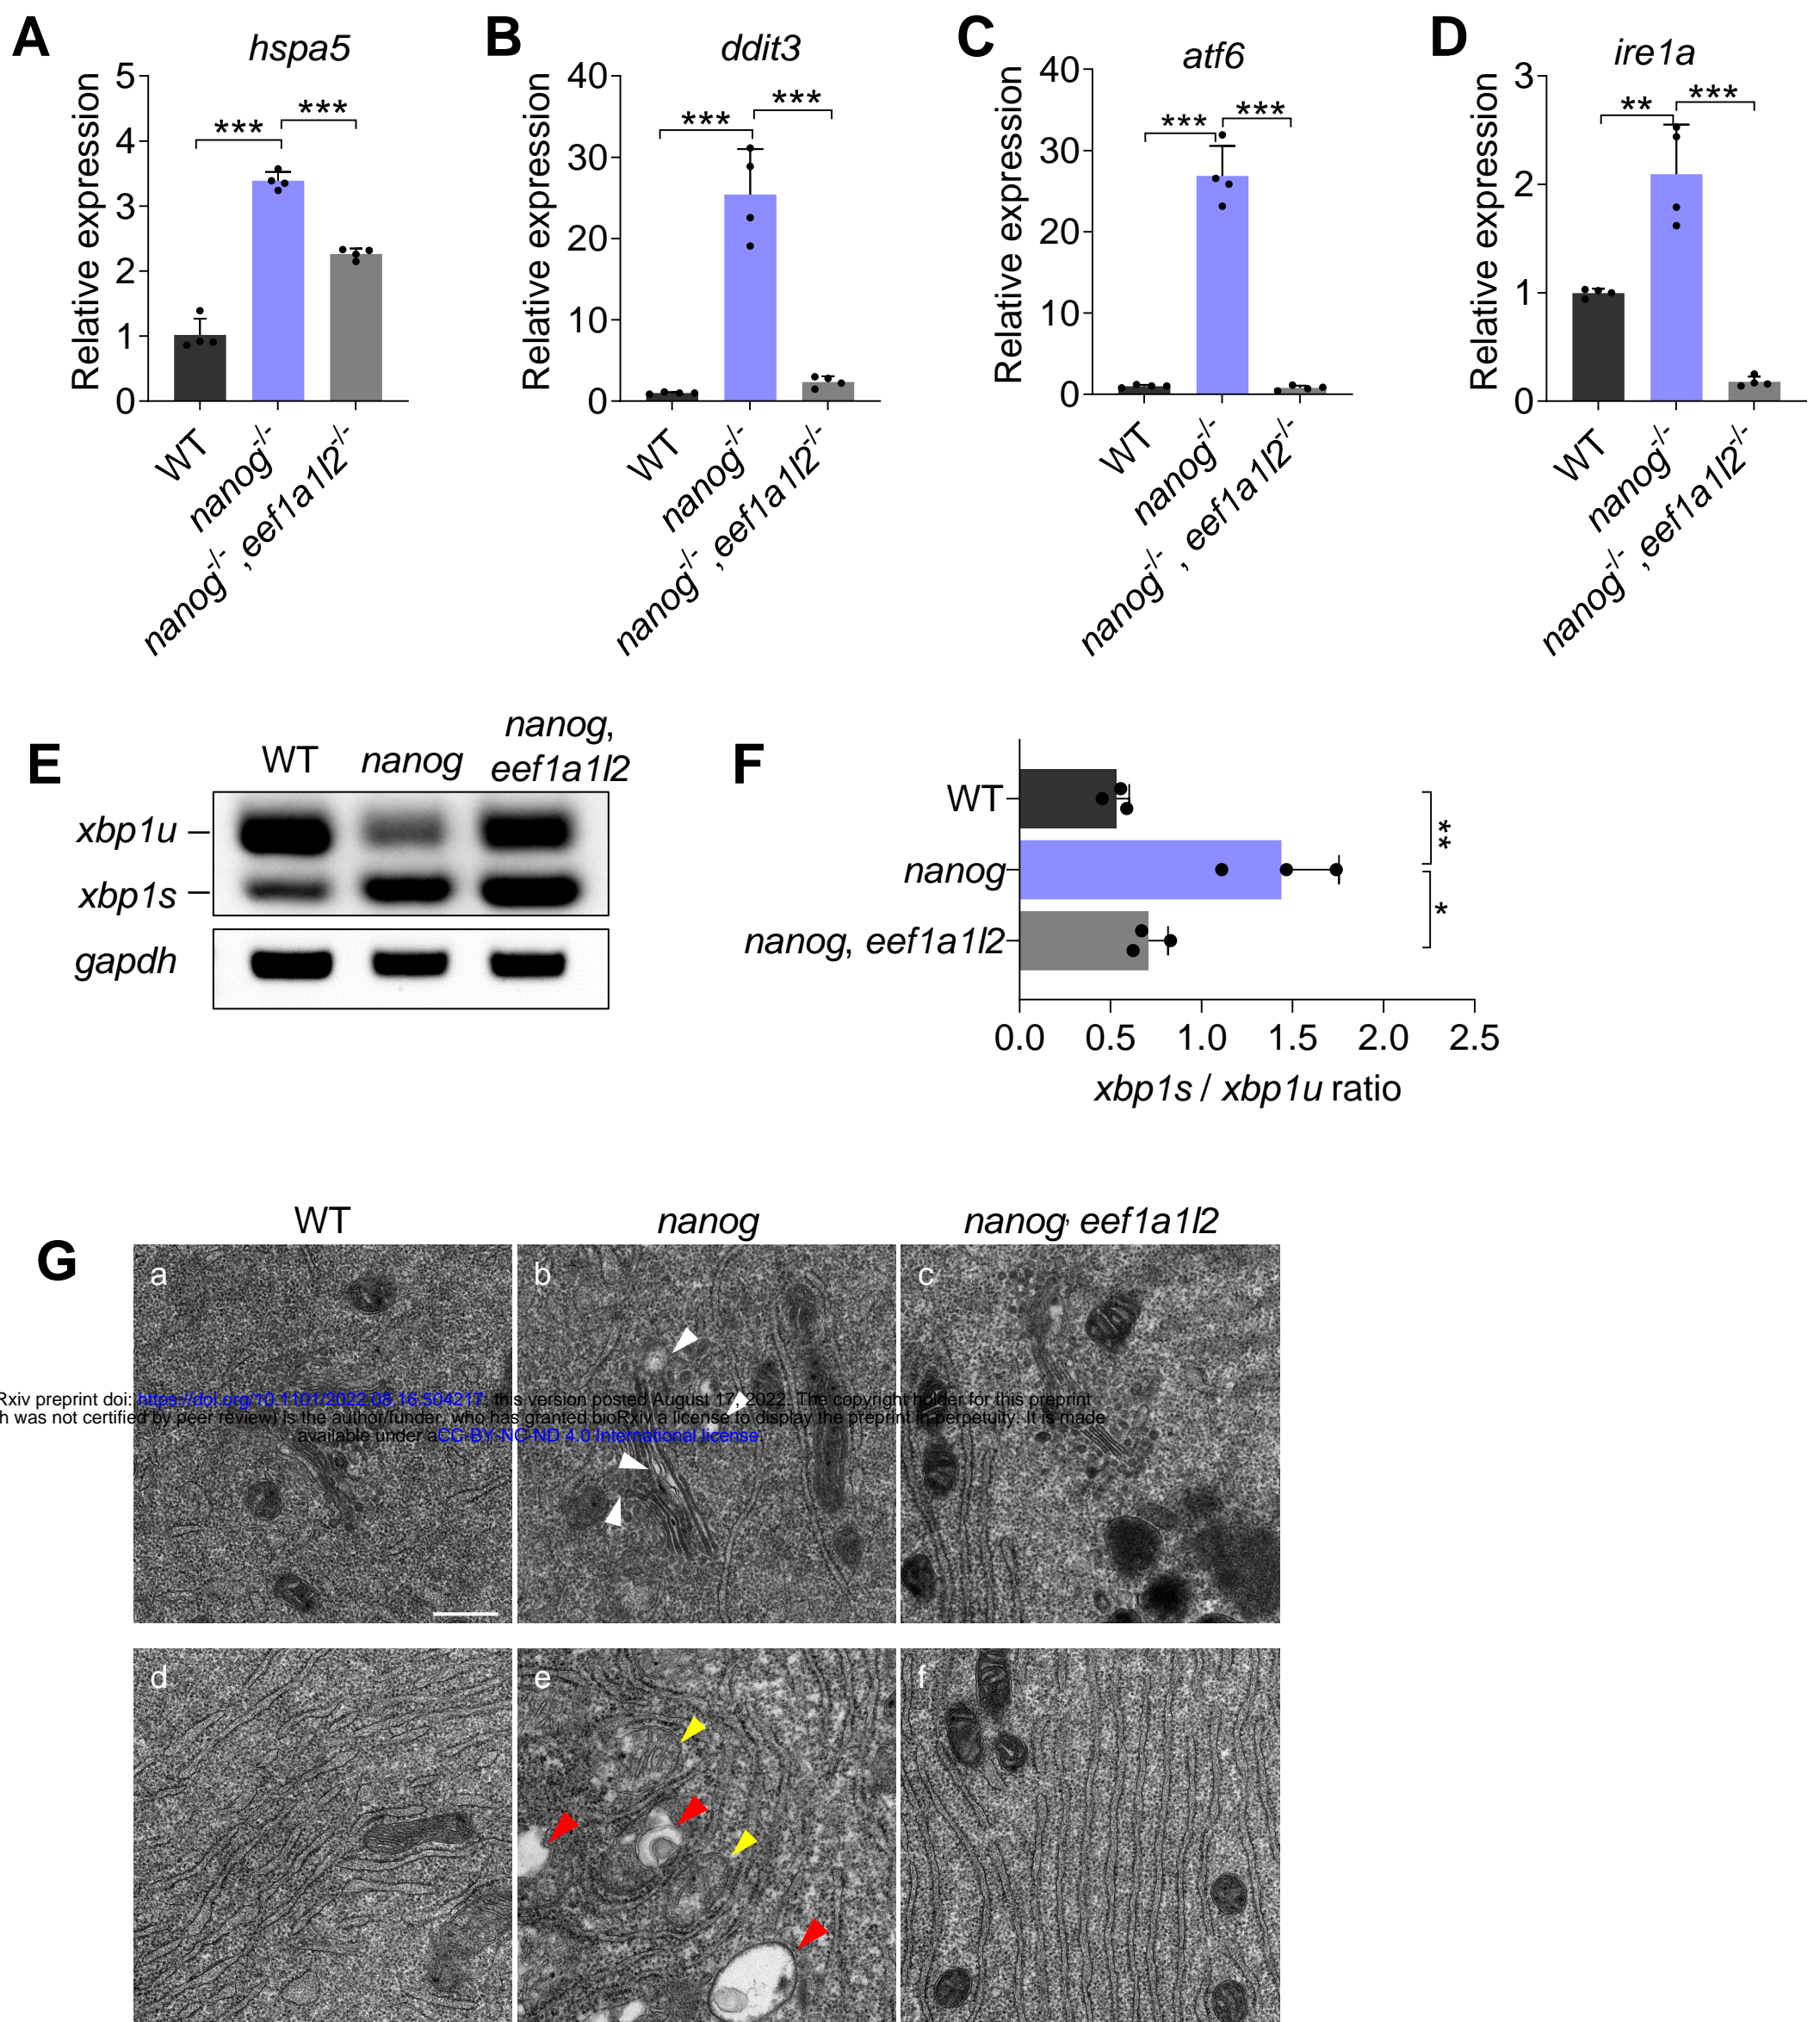

He et al., Fig. 5



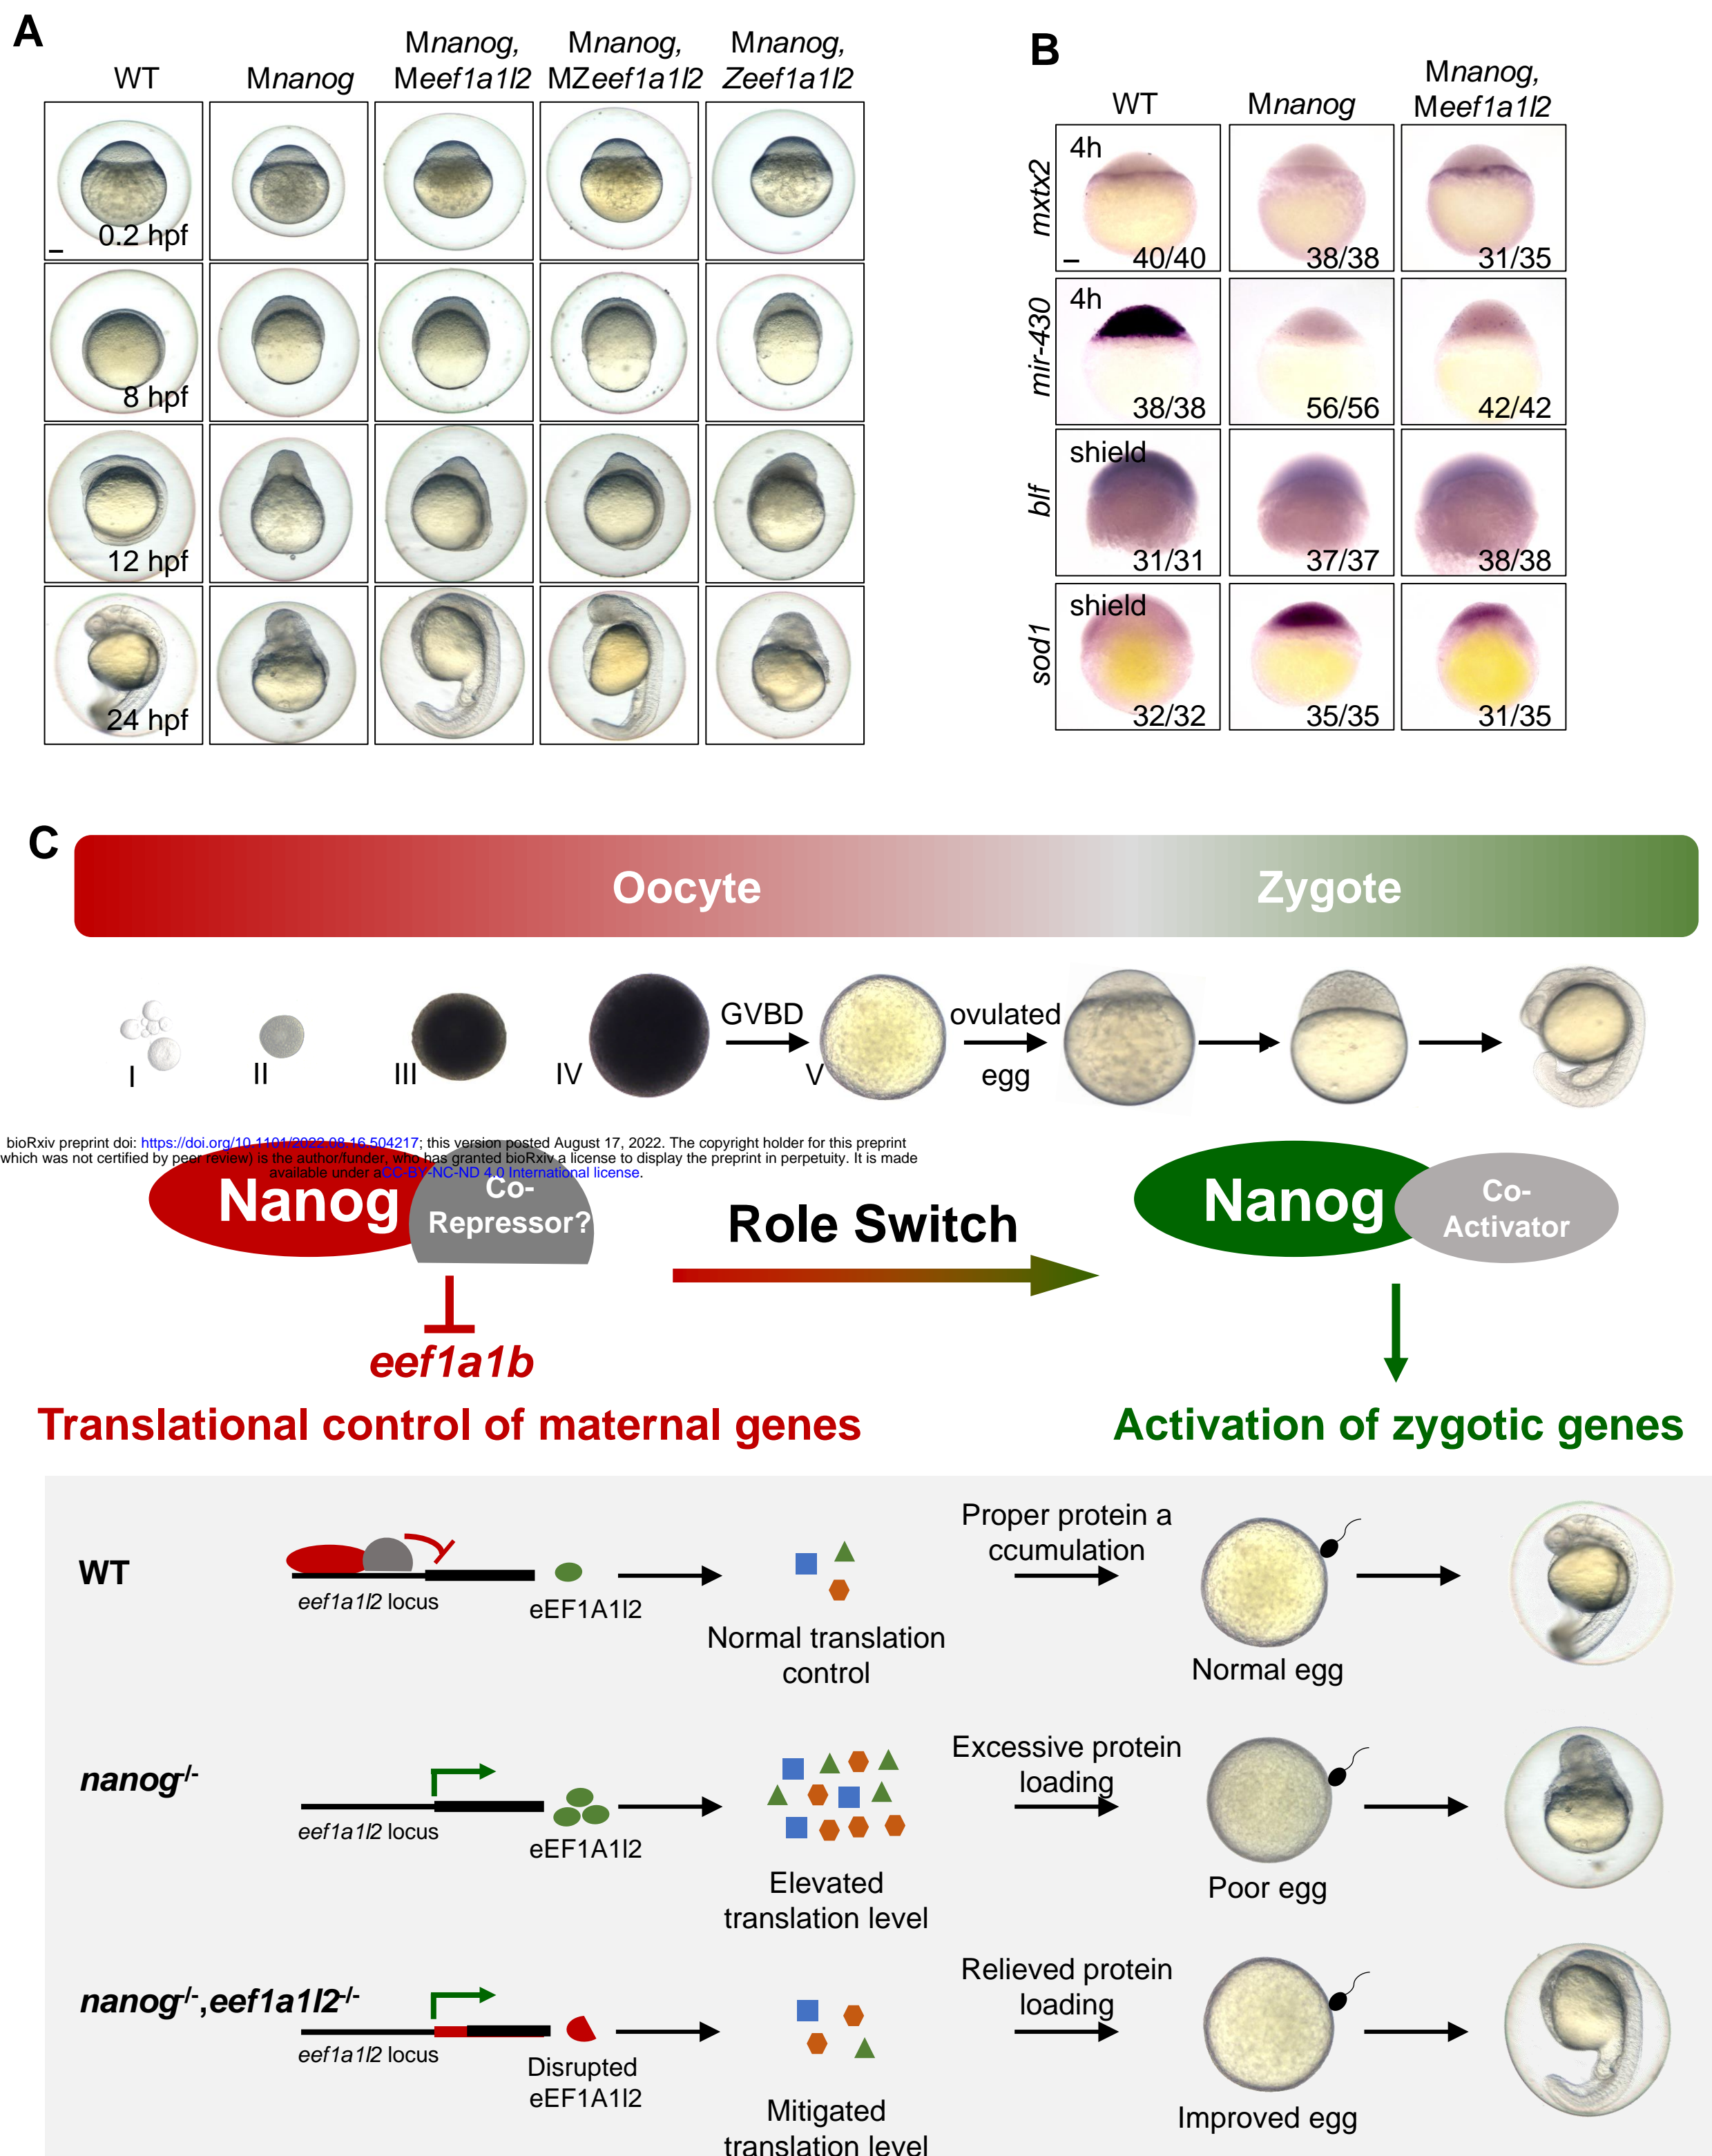

He et al., Fig. 6
